# Supplementary material for: Antimicrobial and Cytotoxic Activities of Constituents from the Fruit of Albizia lebbeck L. Benth (Fabaceae)
Source: MDPI journal article supplement (doi:10.3390/molecules27154823), 2022-07-28
Supplement: s1 [file s1]

# Antimicrobial and cytotoxic activities of constituents from the fruits of *Albizia lebeck* L. Benth (Fabaceae)

Bosco Peron Leutcha<sup>1,2</sup>, Jean Paul Dzoyem<sup>3</sup>, Jean-Bosco Jouda<sup>4</sup>, Denis Kehdinga Sema<sup>1</sup>, Virginie Flaure Tsague Tankeu<sup>1</sup>, Gabin Thierry Mbahbou Bitchagno<sup>5,6</sup>, Billy Toussie Tchegnitegni<sup>2,5,6</sup>, Flaure Rosette Ehawa Essoung<sup>7</sup>, Bruno Ndjakou Lenta<sup>2</sup>, Siméon Fogue Kouam<sup>2</sup>, Alain Meli Lannang<sup>4,8,\*</sup>, Norbert Sewald<sup>6,\*</sup>.

<sup>1</sup>Department of Chemistry, Faculty of Science, University of Maroua, P.O. Box 814, Maroua, Cameroon; peron.leutcha@gmail.com (B.P.L); devansema@gmail.com (D.K.S.); vtsague10@gmail.com (V.F.T.T);

<sup>2</sup>Department of Chemistry, Higher Teacher Training College, University of Yaoundé I, P.O. Box 47, Yaoundé, Cameroon; peron.leutcha@gmail.com (B.P.L); billytoussie@yahoo.fr (B.T.T.); lentabruno@yahoo.fr (B.N.L.); kfogue@yahoo.com (S.F.K.)

<sup>3</sup>Department of Biochemistry, Faculty of Science, University of Dschang, P.O. Box 67, Dschang, Cameroon; jpdzoyem@yahoo.fr (J.P.D)

<sup>4</sup>Department of Chemical Engineering, School of Chemical Engineering and Mineral Industries, P.O. Box 454, Ngaoundéré, Cameroon; joudabosco@yahoo.fr (J-B.J); alainmeli@yahoo.com (A.M.L.)

<sup>5</sup>Departement of Chemistry, Faculty of Science, University of Dschang, P.O. Box 67, Dschang, Cameroon; bmgt198716@ymail.com (G.T.M.B); billytoussie@yahoo.fr (B.T.T)

<sup>6</sup>Department of Chemistry, Organic and Bioorganic Chemistry, Bielefeld University, 33501 Bielefeld, Germany; bmgt198716@ymail.com (G.T.M.B); billytoussie@yahoo.fr (B.T.T.); nobert.sewald@uni-bielefeld.de (N.S.)

<sup>7</sup>University Institute of Technology, University of Ngaoundere, P.O. Box 455, Ngaoundere, Cameroon; rosflaure@yahoo.fr (F.R.E.E.)

---

\* Correspondance: [about:blank](#) alainmeli@yahoo.com

\* Correspondance: [about:blank](#) nobert.sewald@uni-bielefeld.de

<sup>8</sup>Department of Chemistry, Higher Teacher Training College, University of Maroua, P.O. Box 55, Maroua, Cameroon; alainmeli@yahoo.com (A.M.L.)

## Table of Contents

**Figure S1.** HR-ESI-MS (+) spectra of compound **1**

**Figure S2.** <sup>1</sup>H-NMR spectrum (D<sub>2</sub>O, 600 MHz) of compound **1**

**Figure S3.** <sup>13</sup>C-NMR spectrum (D<sub>2</sub>O, 150 MHz) of compound **1**

**Figure S4.** HSQC spectrum of compound **1**

**Figure S5.** COSY <sup>1</sup>H-<sup>1</sup>H spectrum of compound **1**

**Figure S6.** HMBC spectrum of compound **1**

**Figure S7.** NOESY spectrum of compound **1**

**Figure S8.** HR-ESI-MS (+) spectrum of compound **2**

**Figure S9.** <sup>1</sup>H-NMR spectra (600 MHz, DMSO-*d*<sub>6</sub>) of compound **2**

**Figure S10.** <sup>13</sup>C-NMR and DEPT-135 spectra (150 MHz, DMSO- *d*<sub>6</sub>) of compound **2**

**Figure S11.** HMQC spectrum of compound **2**

**Figure S12.** COSY <sup>1</sup>H-<sup>1</sup>H spectrum of compound **2**

**Figure S13.** HMBC spectrum of compound **2**

**Figure S14.** NOESY spectrum of compound **2**

**Figure S15.** <sup>1</sup>H-NMR spectrum (500 MHz, MeOD) of compound **3**

**Figure S16.** <sup>13</sup>C-NMR and DEPT-135 spectra (125 MHz, MeOD) of compound **3**

**Figure S17.** <sup>1</sup>H-NMR spectrum (500 MHz, MeOD) of compound **4**

**Figure S18.** <sup>13</sup>C-NMR and DEPT135 spectra (125 MHz, MeOD) of compound **4**

**Figure S19.** <sup>1</sup>H-NMR spectrum (MeOD, 500 MHz) of compound **5**

**Figure S20.** <sup>13</sup>C-NMR and DEPT-135 spectra (MeOD, 125 MHz) of compound **5**

**Figure S21.** <sup>1</sup>H-NMR spectrum (CDCl<sub>3</sub>; 500 MHz) of compounds **6** and **7**

**Figure S22.** <sup>13</sup>C-NMR and DEPT135 spectra (CDCl<sub>3</sub>; 125 MHz) of compounds **6** and **7**

**Figure S23.** <sup>1</sup>H-NMR spectrum (CDCl<sub>3</sub>, 500 MHz) of compound **8**

**Figure S24.** <sup>13</sup>C-NMR &DEPT-135 spectra (CDCl<sub>3</sub>, 125 MHz) of compound **8**

**Figure S25.**  $^1\text{H}$ -NMR spectrum ( $\text{CDCl}_3$ , 400 MHz) of compound **9**

**Figure S26.**  $^1\text{H}$ -NMR spectrum ( $\text{CDCl}_3$ , 500 MHz) of compound **10**

**Figure S27.**  $^{13}\text{C}$ -NMR and DEPT-135 spectra ( $\text{CDCl}_3$ , 125 MHz) of compound **10**

**Figure S28.**  $^1\text{H}$ -NMR spectrum ( $\text{MeOD}$ ; 600 MHz) of compound **11**

**Figure S29.**  $^{13}\text{C}$ -NMR and DEPT-135 spectra ( $\text{MeOD}$ ; 150 MHz) of compound **11**

**Figure S30.**  $^1\text{H}$ -NMR spectrum ( $\text{D}_2\text{O}$ , 600 MHz) of compound **12**

**Figure S31.**  $^{13}\text{C}$ -NMR spectrum ( $\text{D}_2\text{O}$ , 150 MHz) of compound **12**

**Figure S32.**  $^1\text{H}$ -NMR spectrum ( $\text{DMSO}-d_6$ , 600 MHz) of compound **13**

**Figure S33.**  $^{13}\text{C}$ -NMR spectrum ( $\text{DMSO}-d_6$ , 150 MHz) of compound **13**

**Figure S34.**  $^1\text{H}$ -NMR spectrum ( $\text{CDCl}_3$ , 500 MHz) of compound **14** and **16**

**Figure S35.**  $^1\text{H}$ -NMR spectrum ( $\text{DMSO}-d_6$ , 500 MHz) of compounds **15** and **17**

**Figure S36.**  $^{13}\text{C}$ -NMR spectrum ( $\text{DMSO}-d_6$ , 125 MHz) of compound **17**

**Figure S37.**  $^1\text{H}$ -NMR spectrum ( $\text{CDCl}_3$ , 500 MHz) of compound **18**

**Figure S38.**  $^1\text{H}$ -NMR spectrum ( $\text{MeOD}$ , 500 MHz) of compound **19**

**Figure S39.**  $^{13}\text{C}$ -NMR spectrum ( $\text{CDCl}_3/\text{MeOD}$ , 125 MHz) of compound **19**

**Figure S40.**  $^1\text{H}$ -NMR spectrum ( $\text{DMSO}-d_6$ , 500 MHz) of compound **20**

**Figure S41.**  $^{13}\text{C}$ -NMR spectrum ( $\text{DMSO}-d_6$ , 500 MHz) of compound **20**

**Figure S42.**  $^1\text{H}$ -NMR spectrum ( $\text{Pyridine}-d_5$ , 500 MHz) of compound **21**

**Figure S43.**  $^{13}\text{C}$ -NMR spectrum ( $\text{Pyridine}-d_5$ , 125 MHz) of compound **21**

**Figure S44.**  $^1\text{H}$ -NMR spectrum ( $\text{DMSO}-d_6$ , 500 MHz) of compound **22**

**Figure S45.**  $^{13}\text{C}$ -NMR and DEPT-135 spectra ( $\text{DMSO}-d_6$ , 125 MHz) of compound **22**

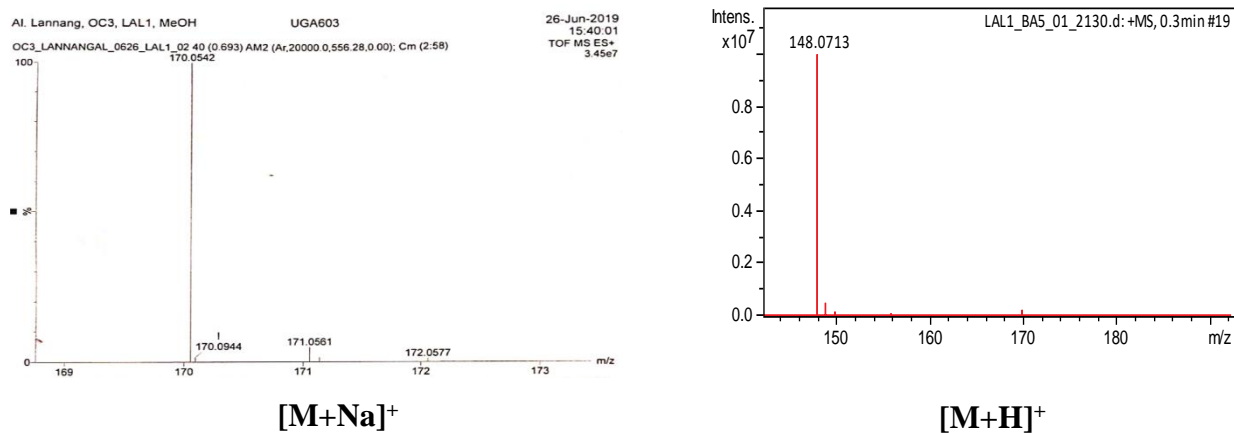

**Figure S1.** HR-ESI-MS (+) spectra of compound **1**

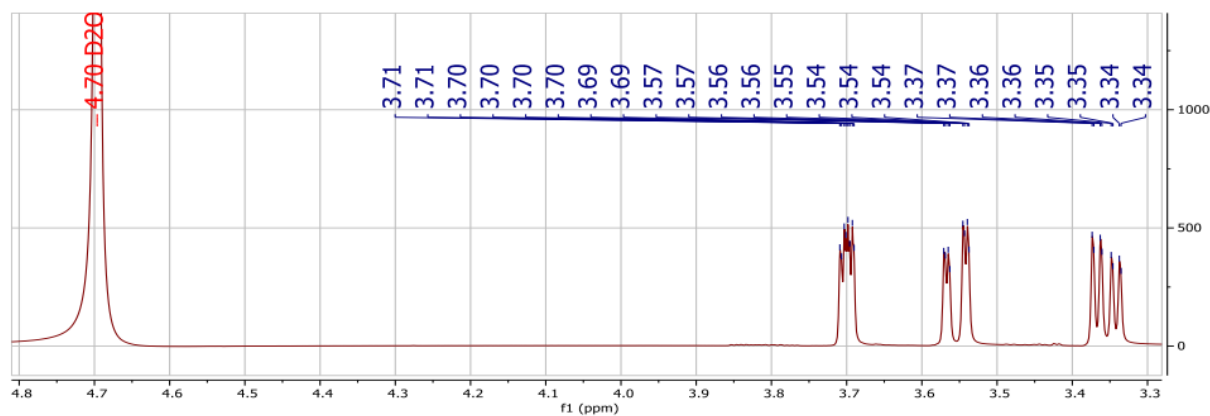

**Figure S2.**  $^1\text{H}$ -NMR spectrum (D<sub>2</sub>O, 600 MHz) of compound **1**

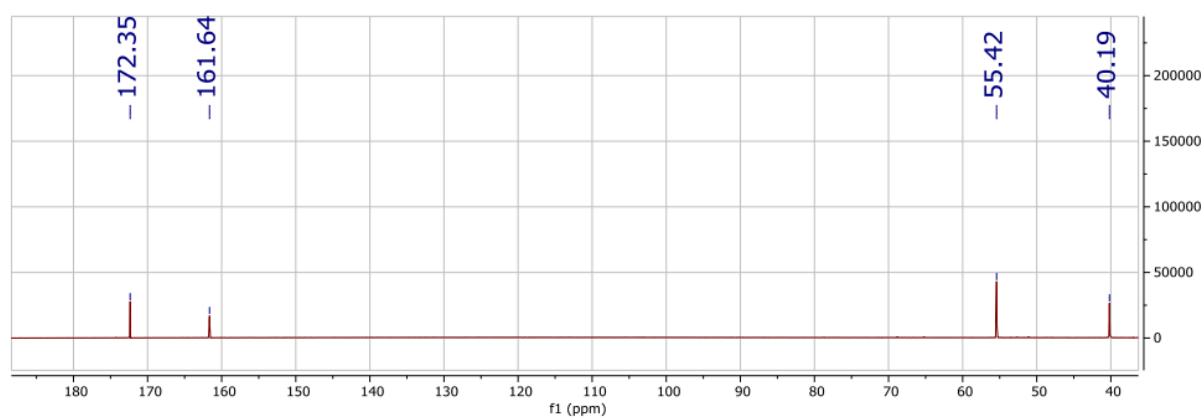

**Figure S3.**  $^{13}\text{C}$ -NMR spectrum (D<sub>2</sub>O, 150 MHz) of compound **1**

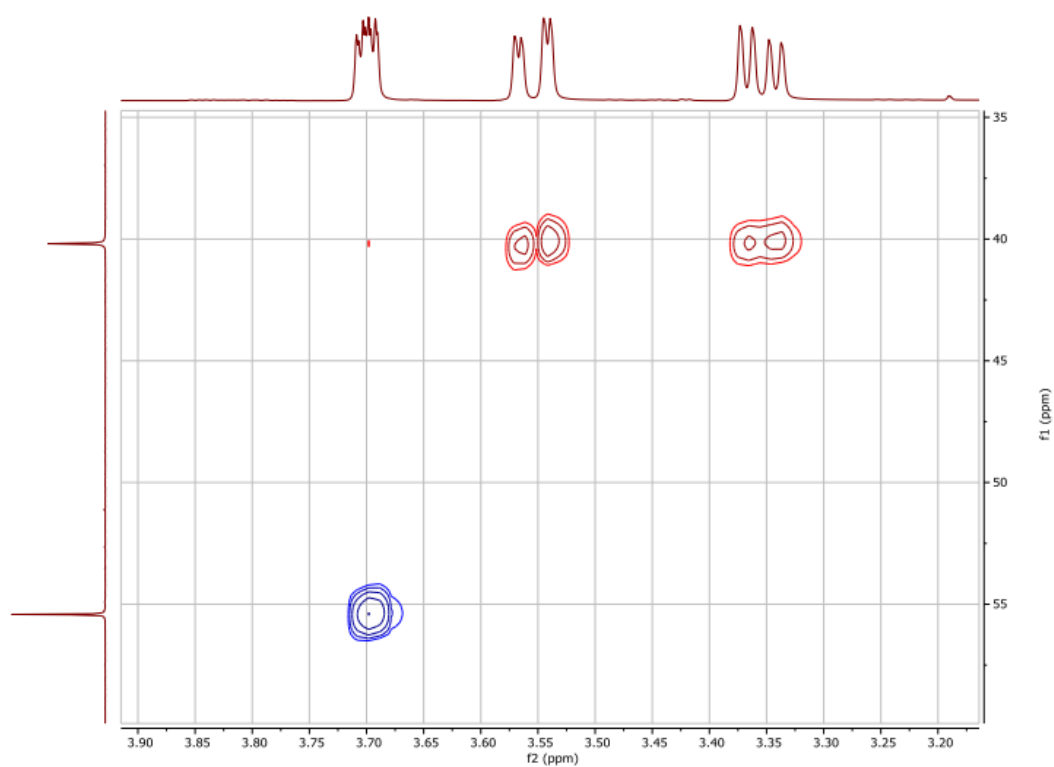

**Figure S4.** HSQC spectrum of compound **1**

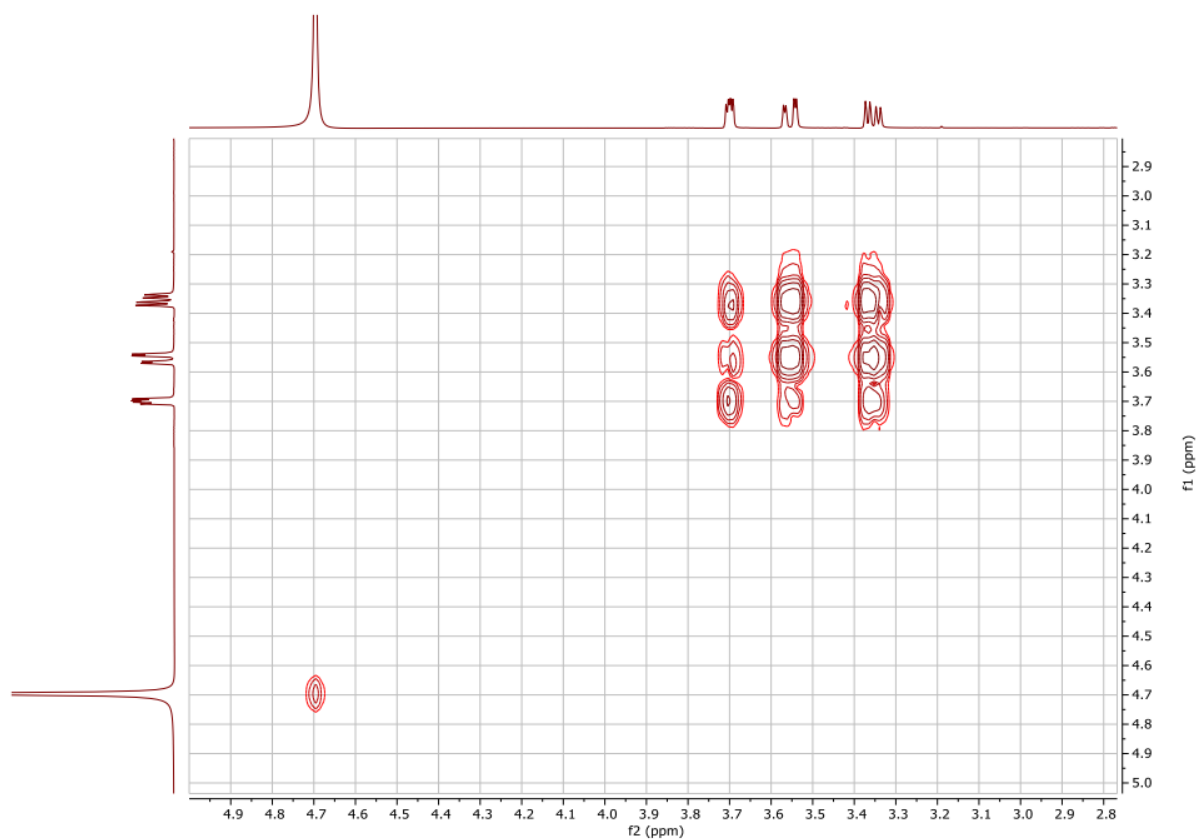

**Figure S5.** COSY  $^1\text{H}$ - $^1\text{H}$  spectrum of compound **1**

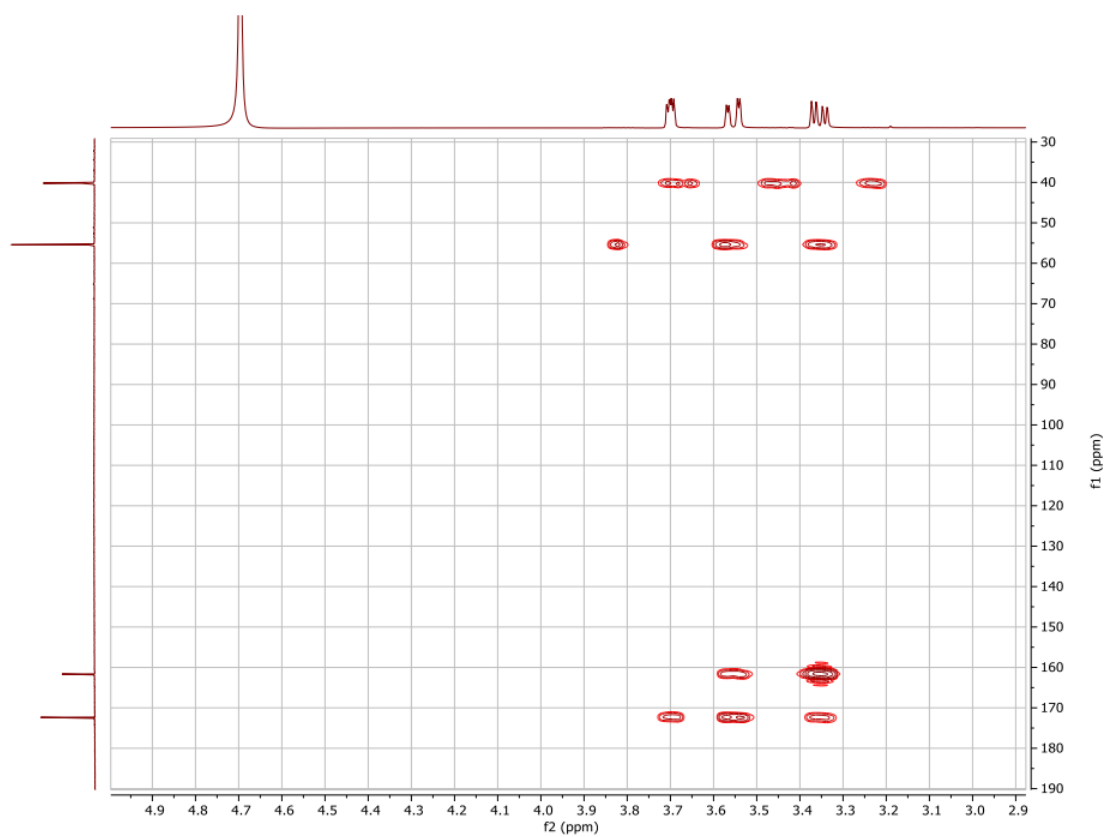

**Figure S6.** HMBC spectrum of compound **1**

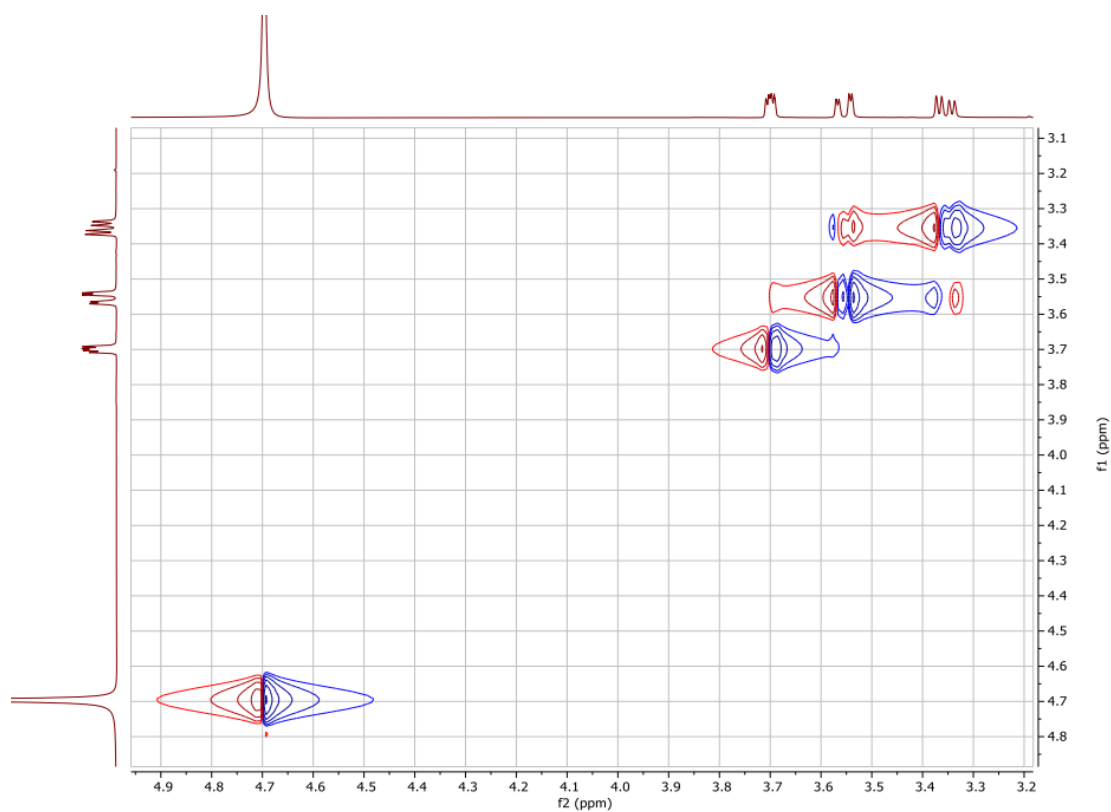

**Figure S7.** NOESY spectrum of compound **1**

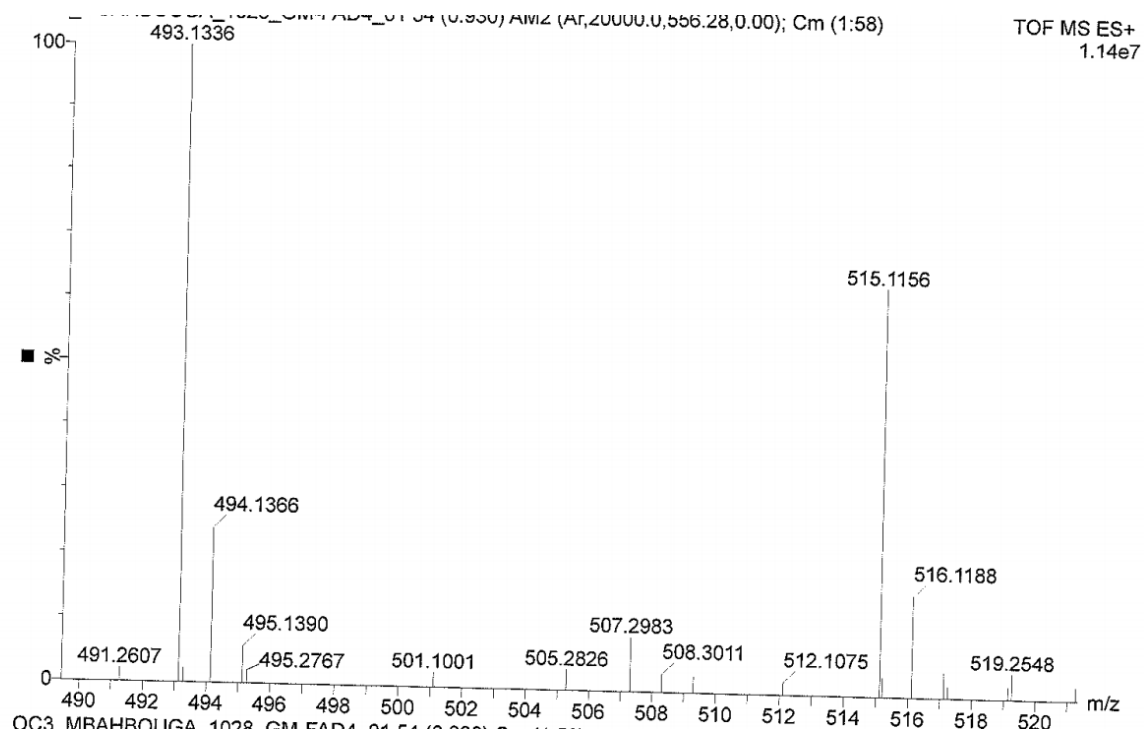

**Figure S8.** HR-ESI-MS (+) spectrum of compound **2**

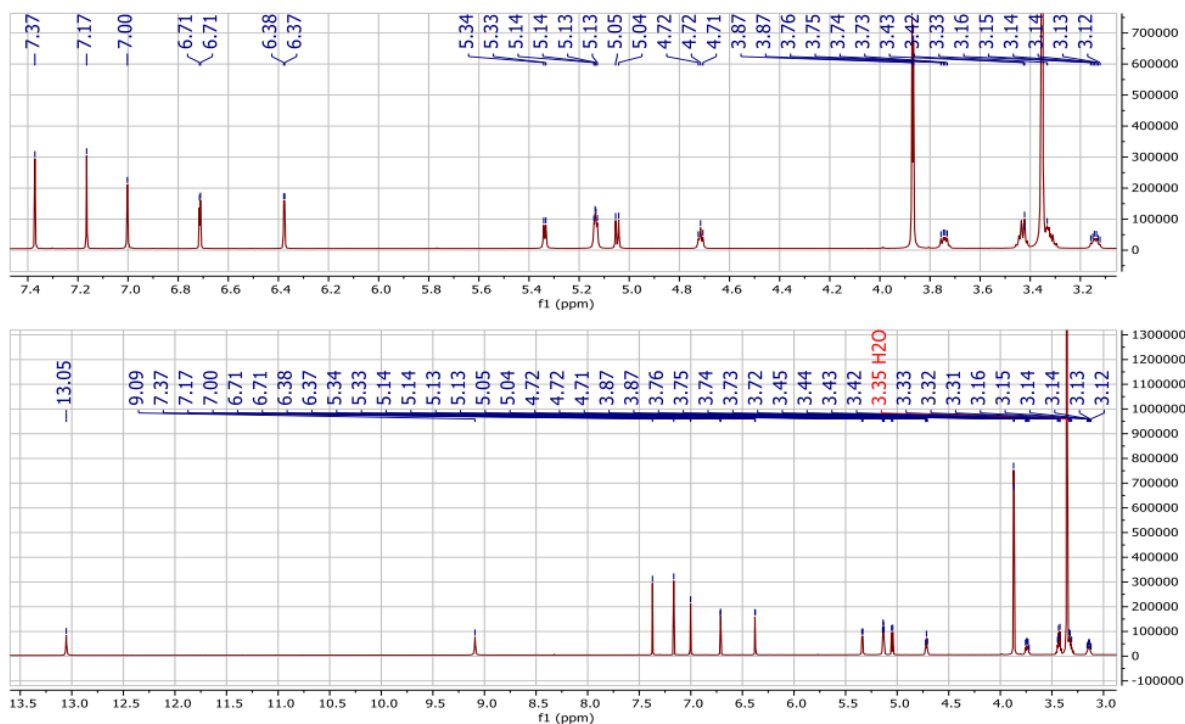

**Figure S9.**  $^1\text{H}$ -NMR spectra (600 MHz,  $\text{DMSO}-d_6$ ) of compound 2

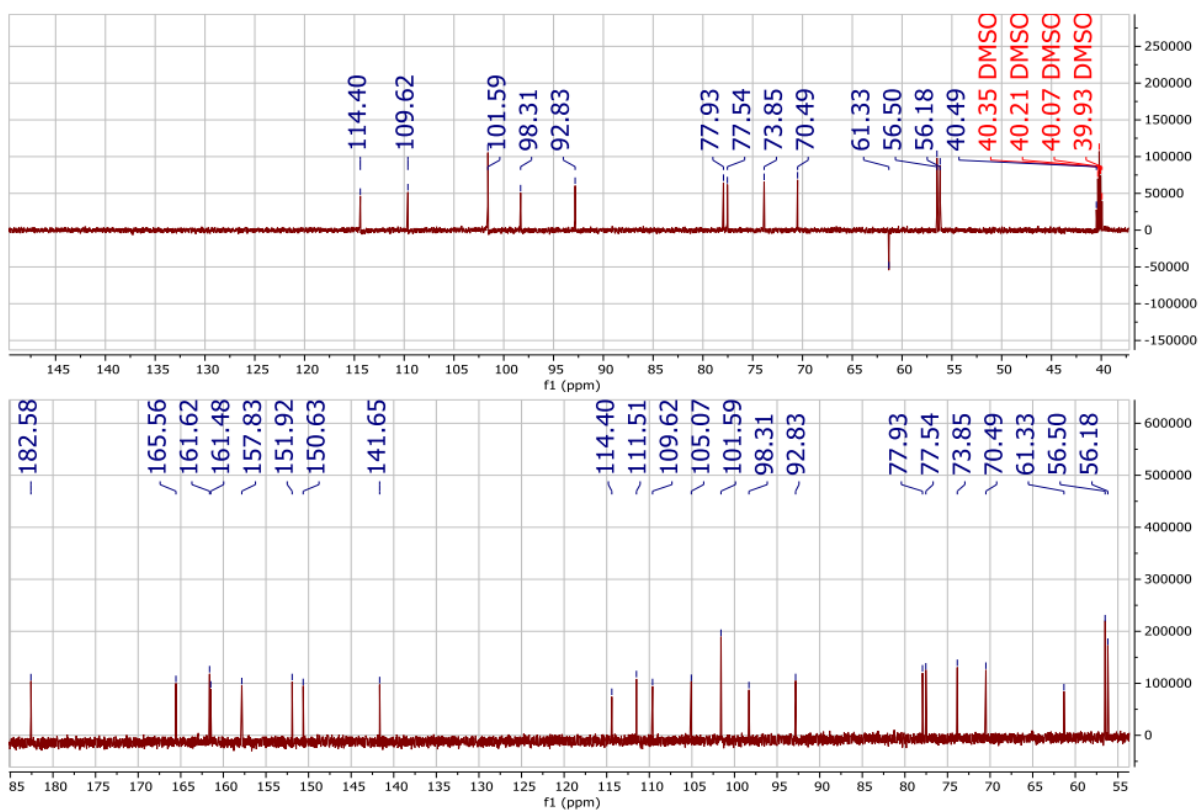

**Figure S10.**  $^{13}\text{C}$ -NMR and DEPT 135 spectra (150 MHz,  $\text{DMSO}-d_6$ ) of compound 2



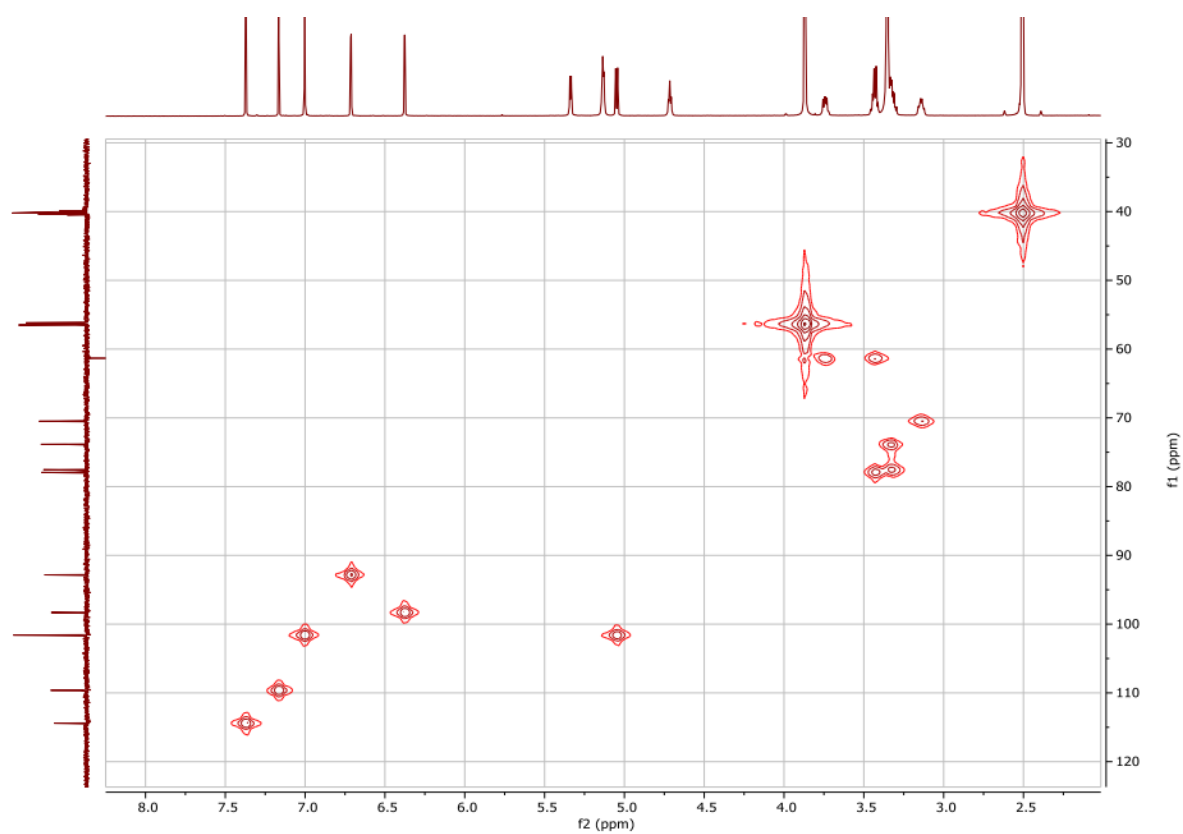

**Figure S11.** HMQC spectrum of compound **2**

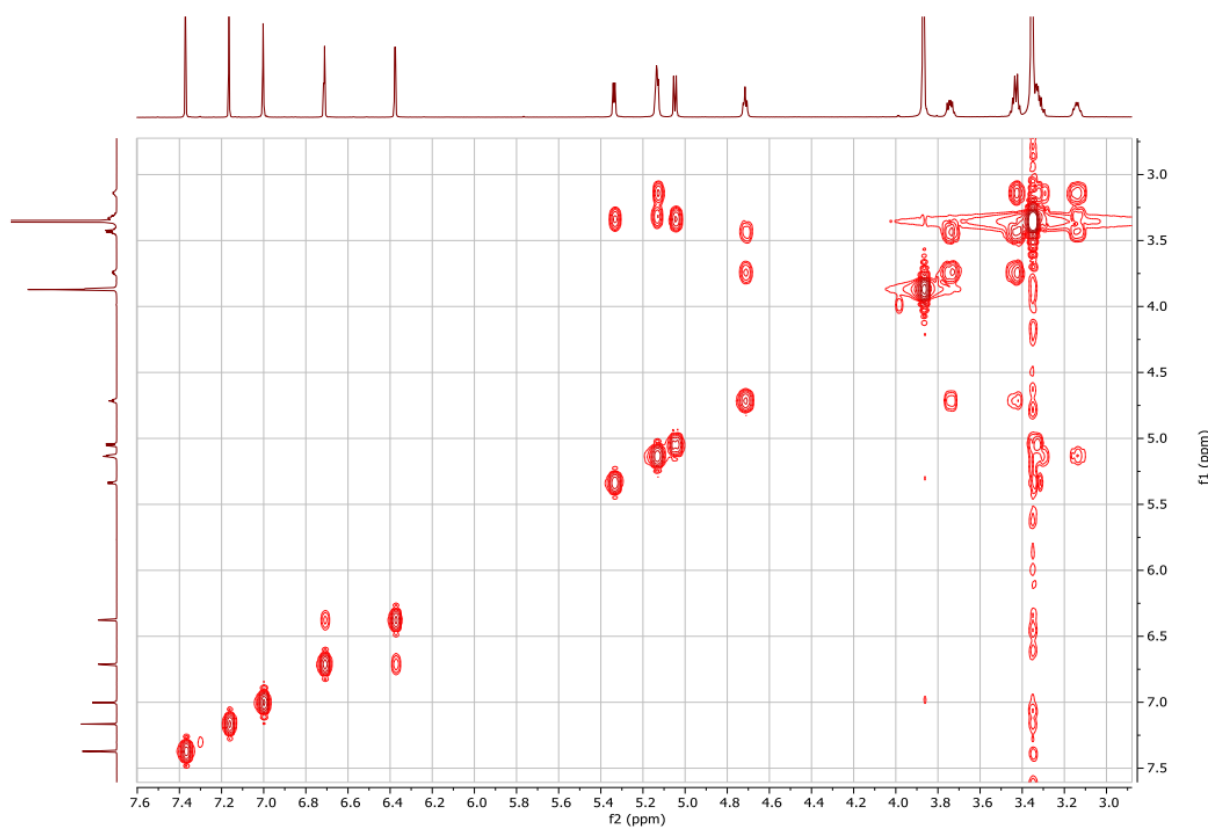

**Figure S12.** COSY  $^1\text{H}$ - $^1\text{H}$  spectrum of compound **2**

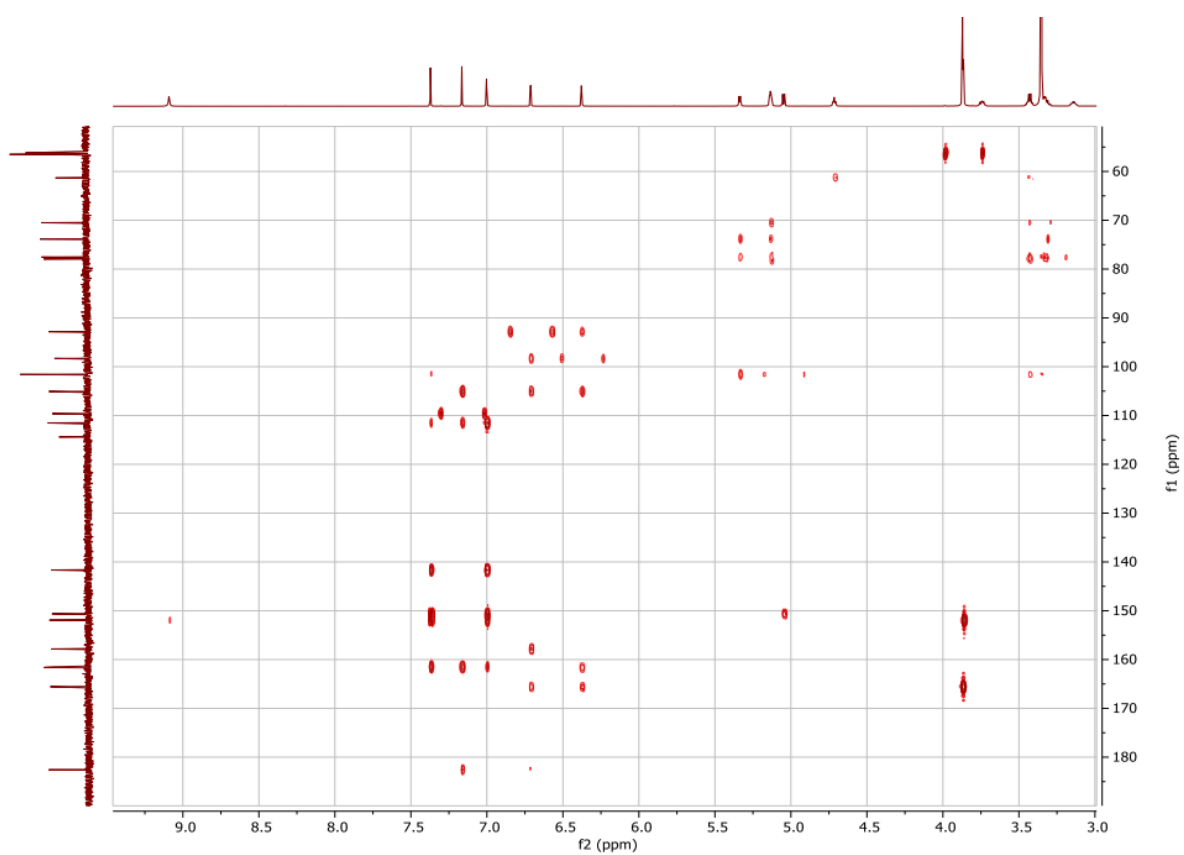

**Figure S13.** HMBC spectrum of compound **2**

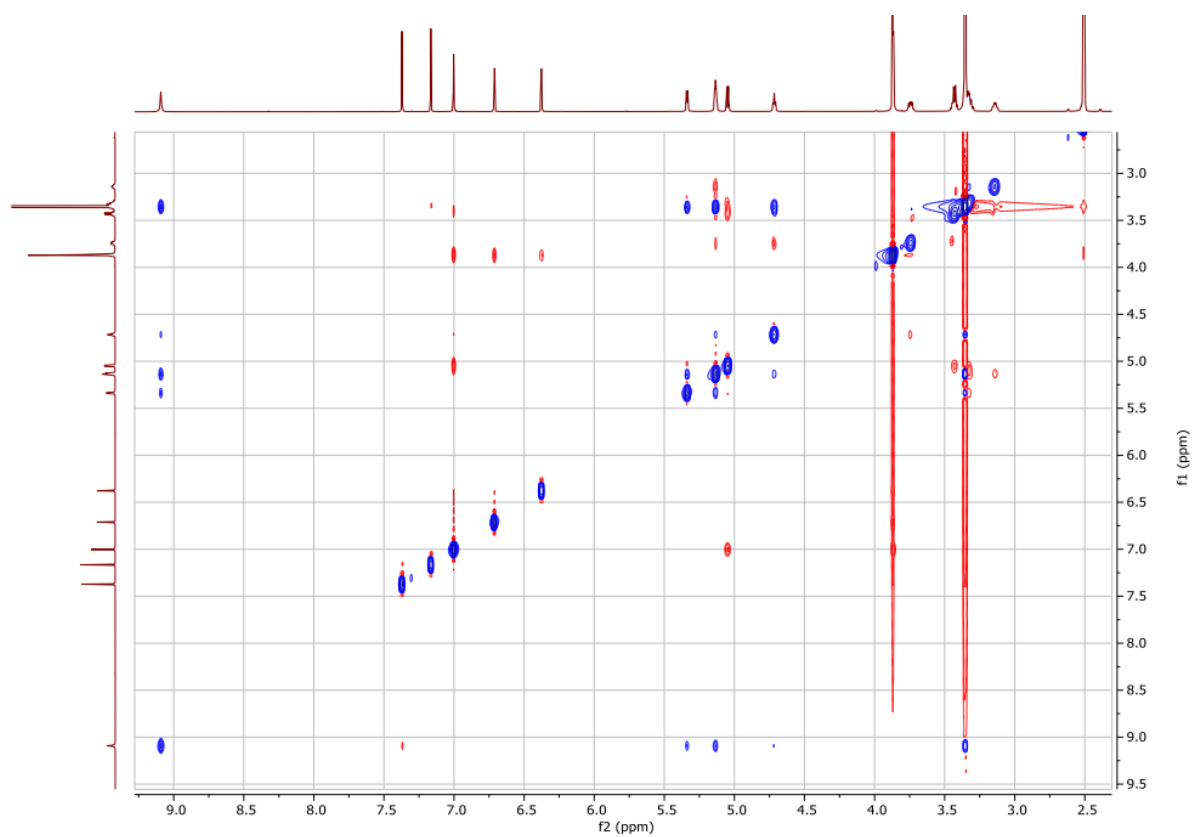

**Figure S14.** NOESY spectrum of compound **2**

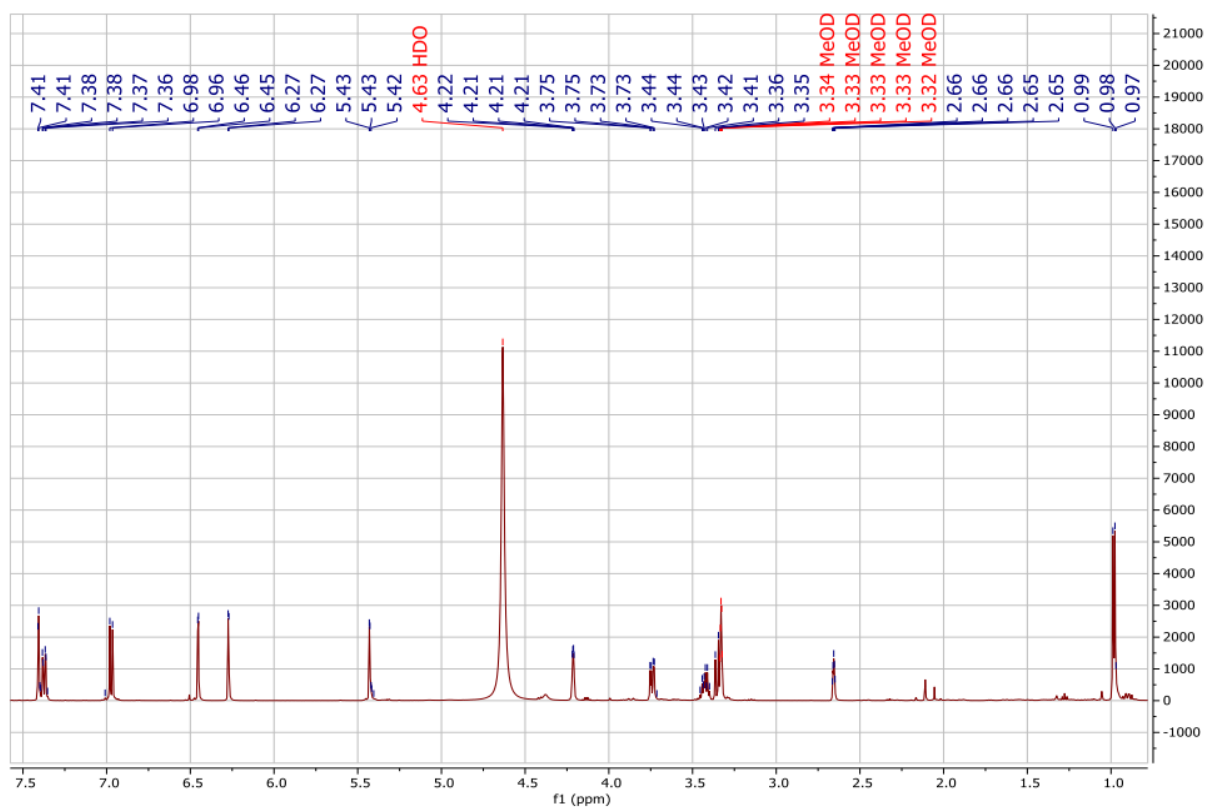

**Figure S15.** <sup>1</sup>H-NMR spectrum (500 MHz, MeOD) of compound **3**

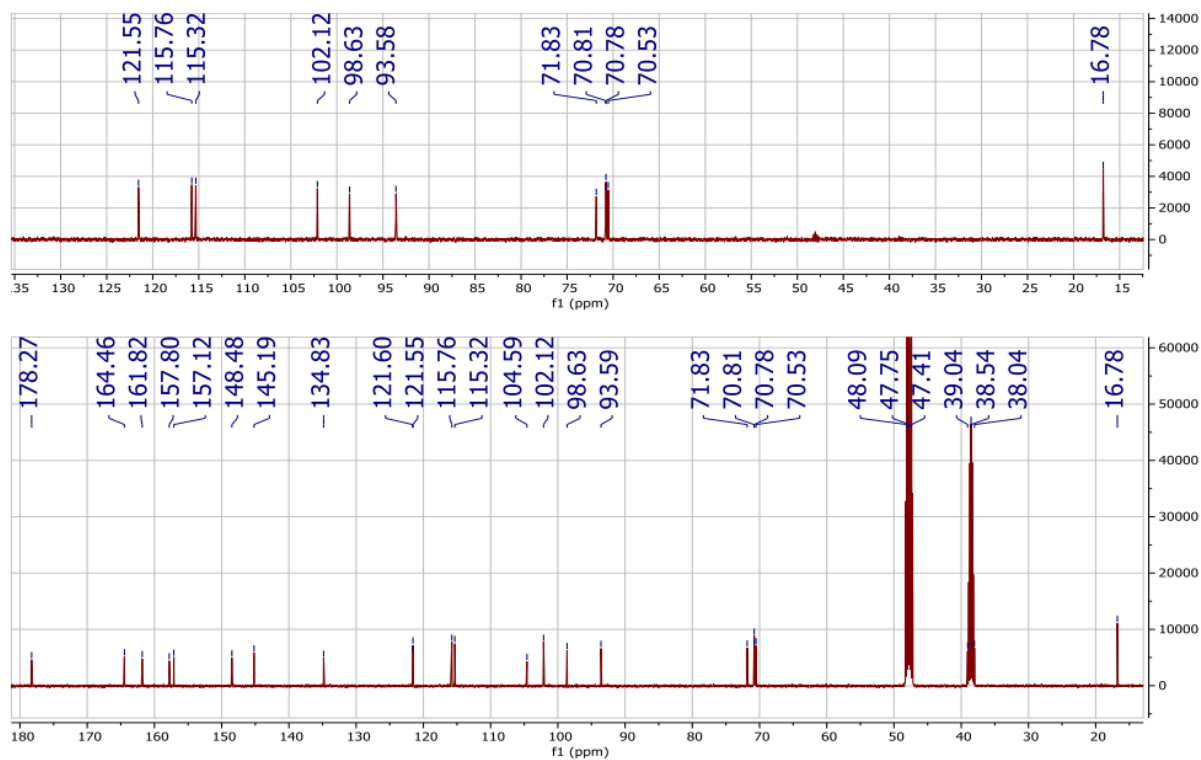

**Figure S16.**  $^{13}\text{C}$ -NMR and DEPT 135 spectra (125 MHz, MeOD) of compound **3**

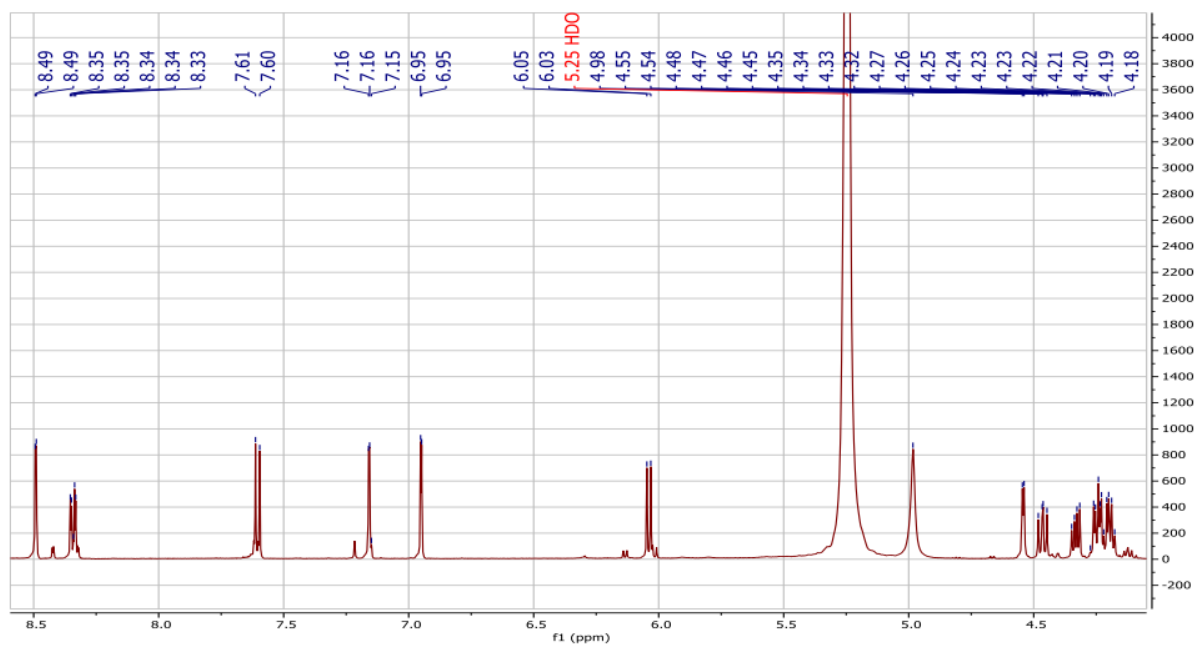

**Figure S17.**  $^1\text{H}$ -NMR spectrum (500 MHz, MeOD) of compound **4**

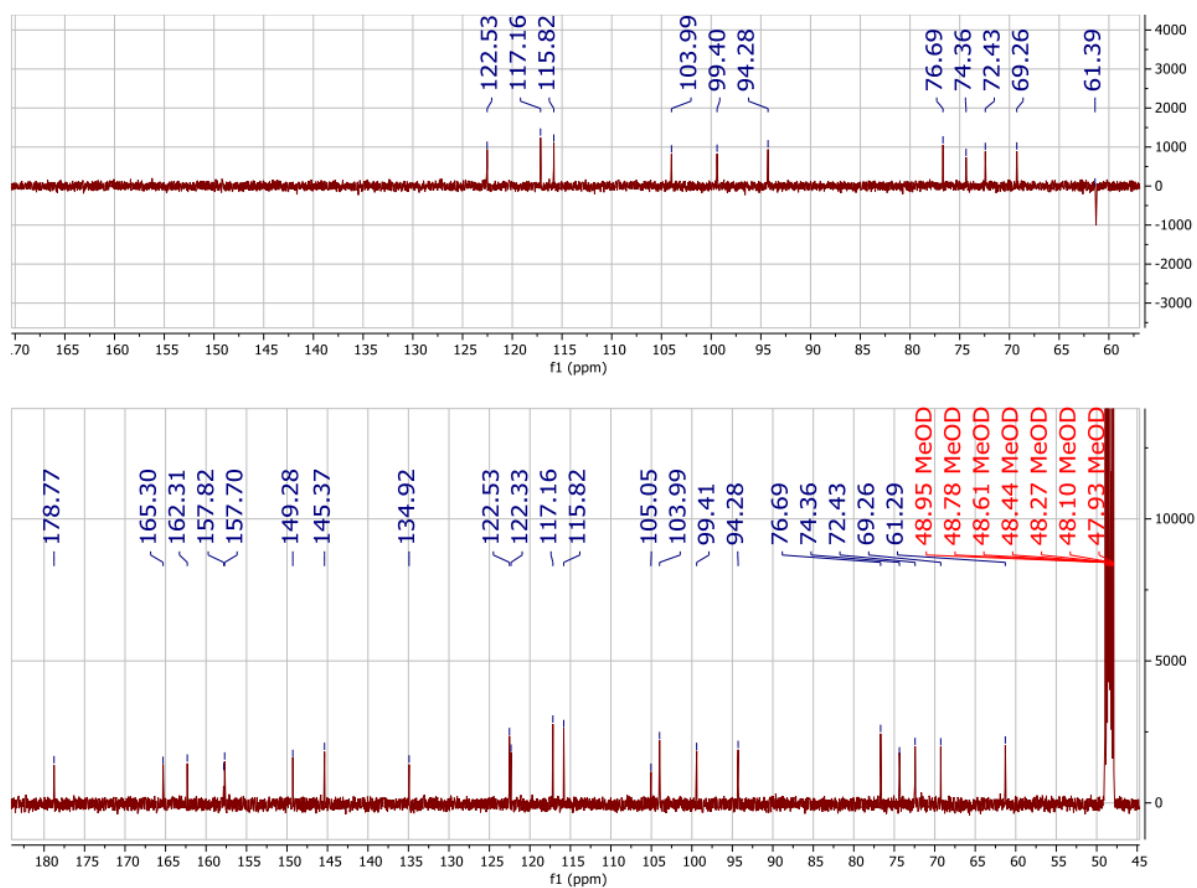

**Figure S18.**  $^{13}\text{C}$ -NMR and DEPT135 spectra (125 MHz, MeOD) of compound **4**

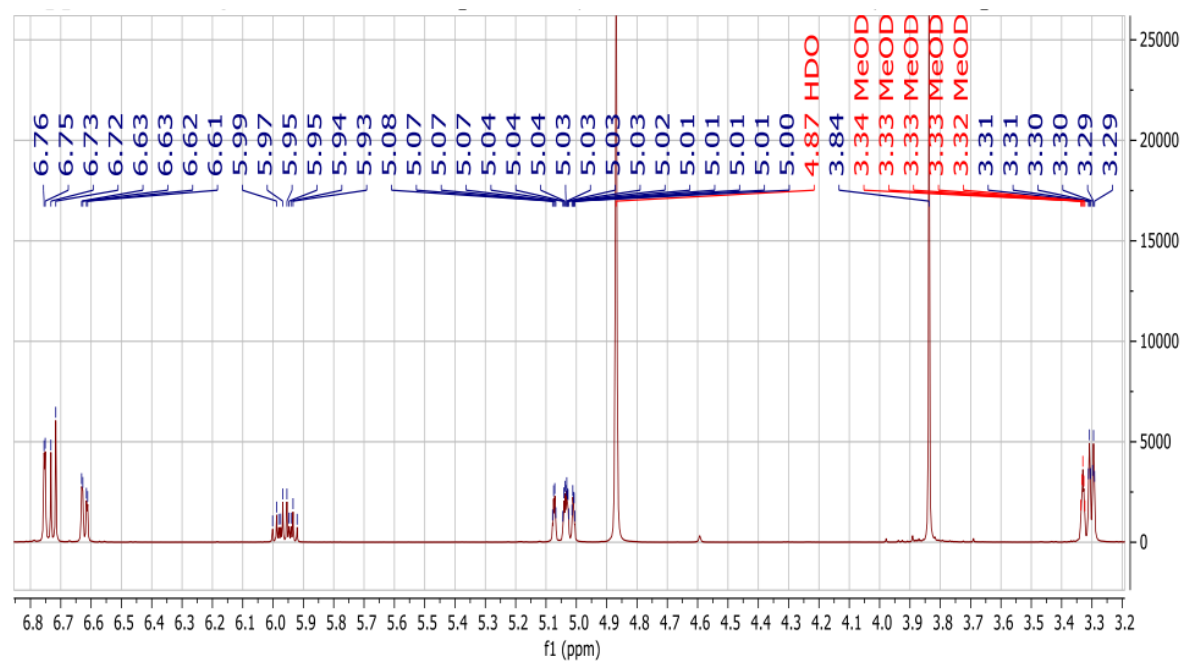

**Figure S19.**  $^1\text{H}$ -NMR spectrum (MeOD, 500 MHz) of compound **5**

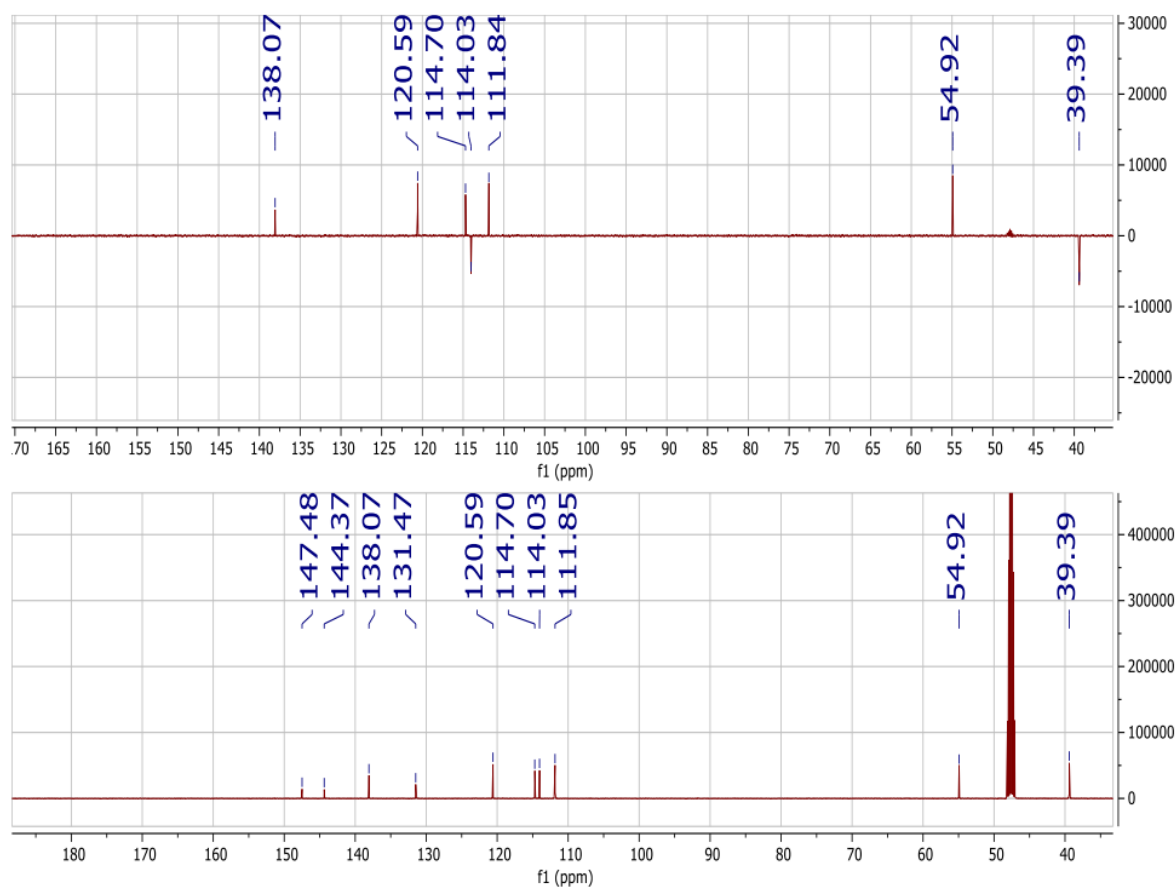

**Figure S20.**  $^{13}\text{C}$ -NMR and DEPT 135 spectra (MeOD, 125 MHz) of compound **5**

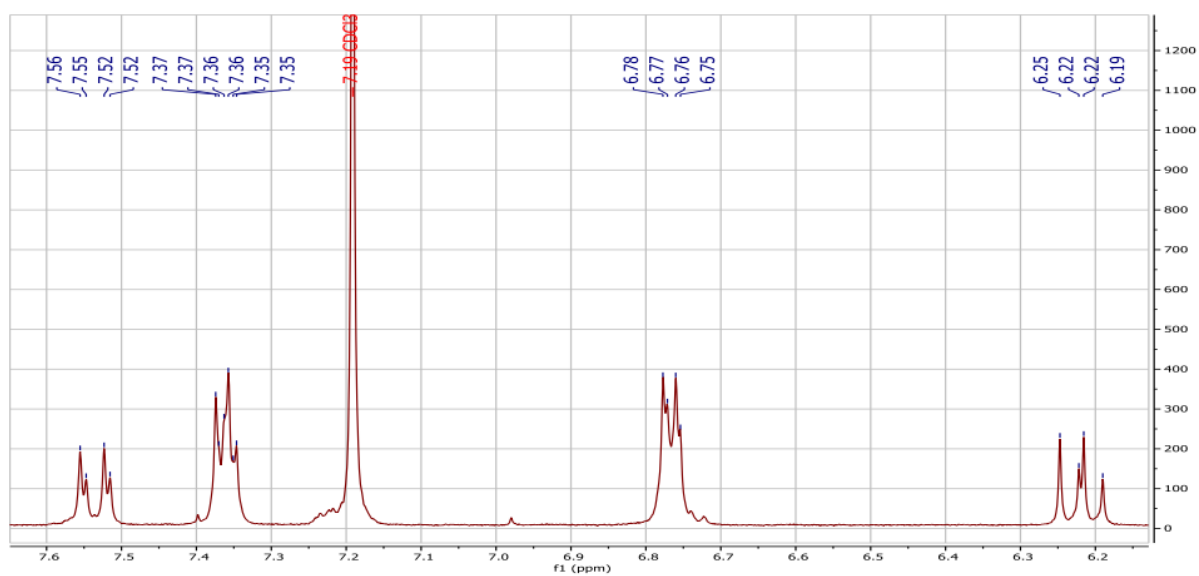

**Figure S21.**  $^1\text{H}$ -NMR spectrum ( $\text{CDCl}_3$ ; 500 MHz) of compounds **6** and **7**

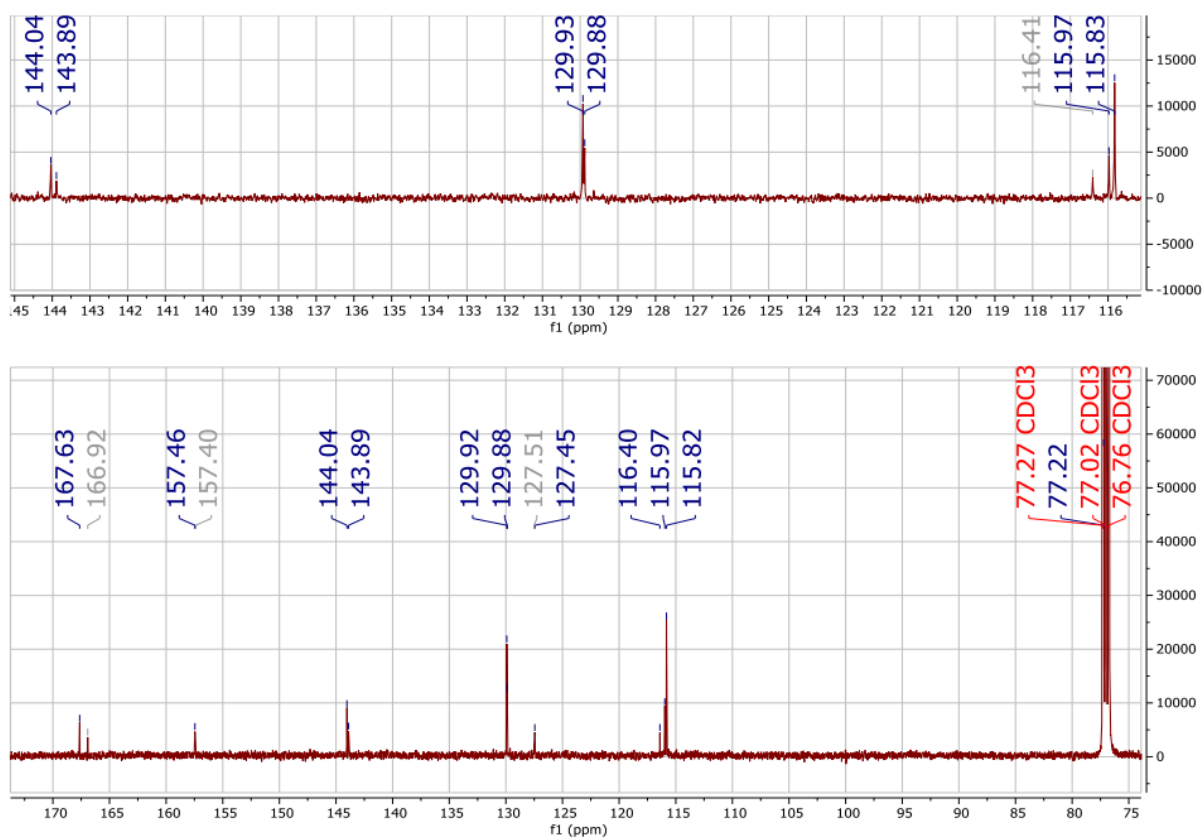

**Figure S22.**  $^{13}\text{C}$ -NMR and DEPT 135 spectra ( $\text{CDCl}_3$ ; 125 MHz) of compounds **6** and **7**

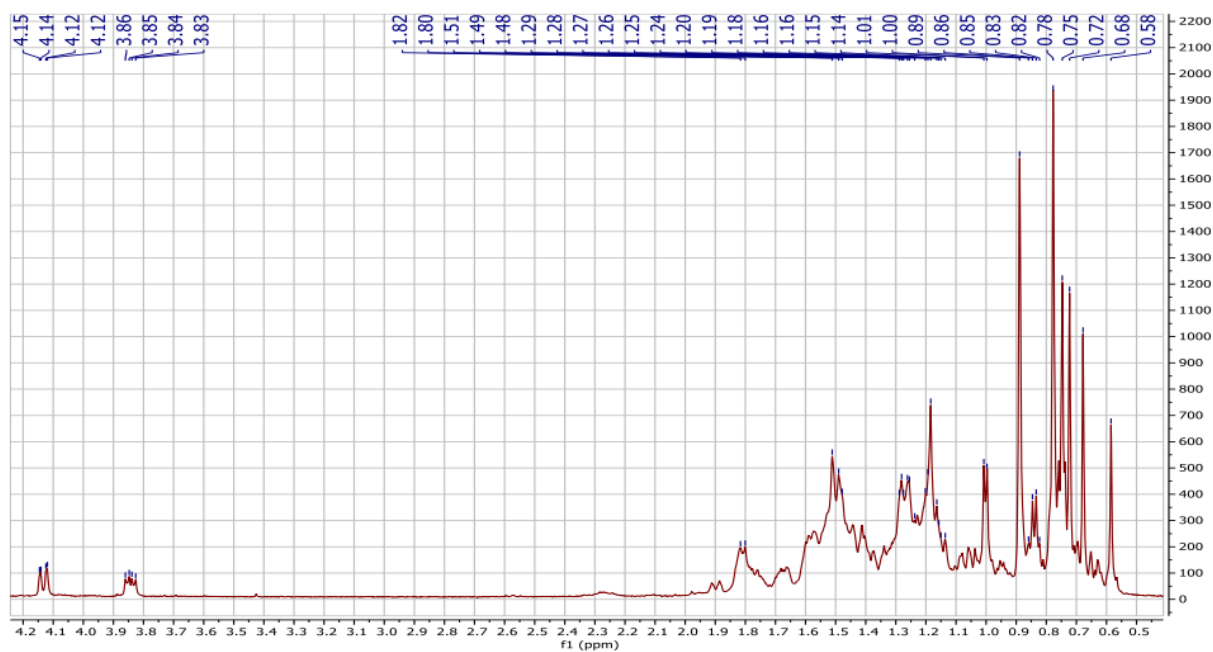

**Figure S23.**  $^1\text{H}$ -NMR spectrum ( $\text{CDCl}_3$ , 500 MHz) of compound **8**

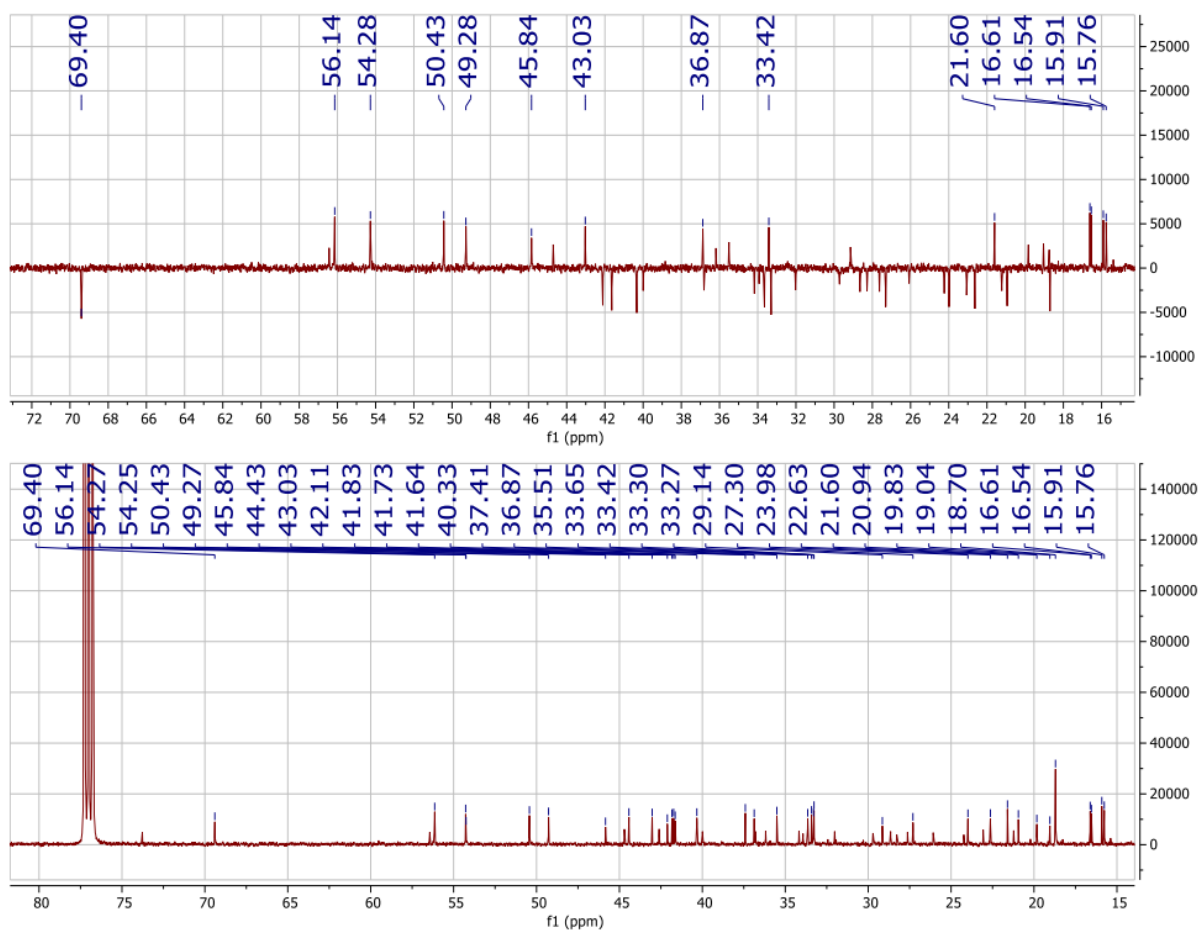

**Figure S24.**  $^{13}\text{C}$ -NMR & DEPT 135 spectra ( $\text{CDCl}_3$ , 125 MHz) of compound **8**

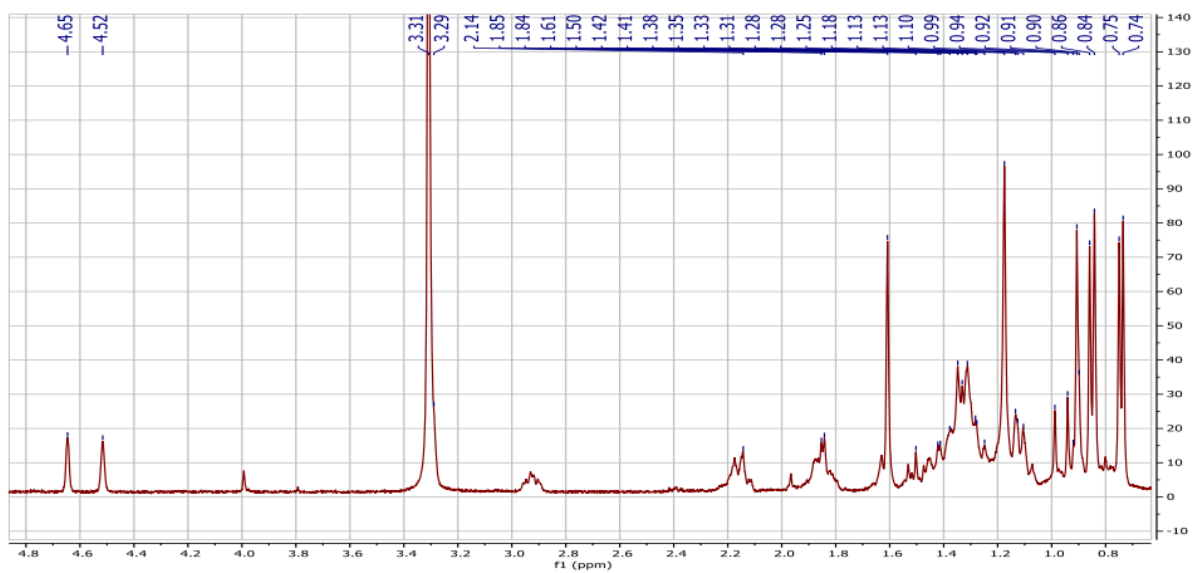

**Figure S25.**  $^1\text{H}$ -NMR spectrum ( $\text{CDCl}_3$ , 400 MHz) of compound **9**



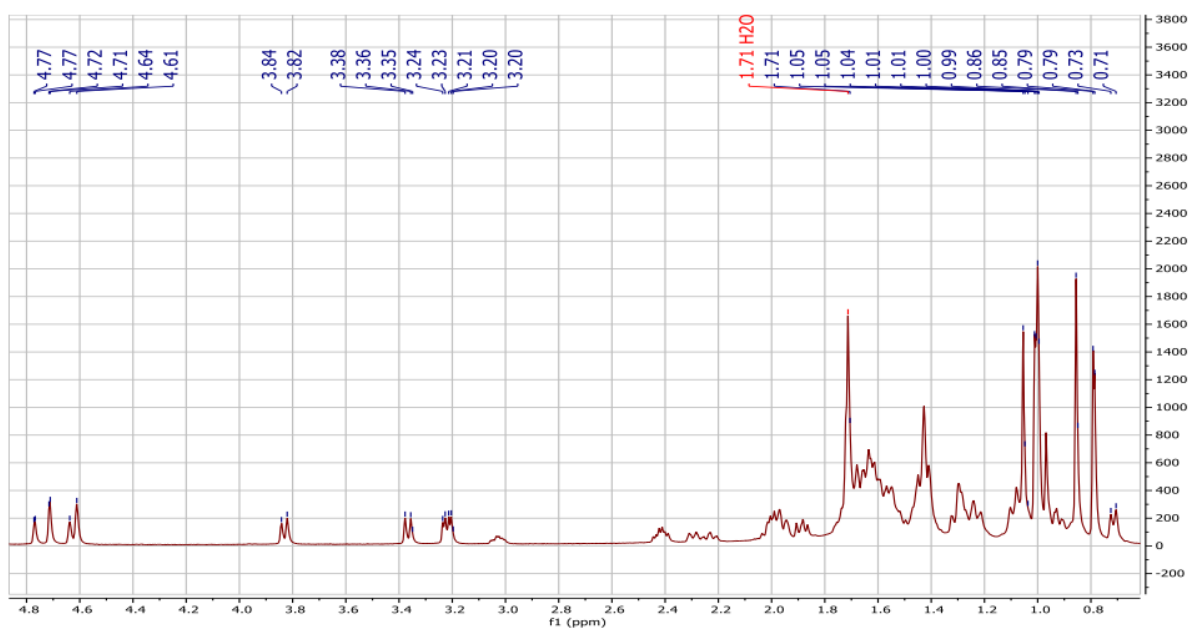

**Figure S26.** <sup>1</sup>H-NMR spectrum (CDCl<sub>3</sub>, 500 MHz) of compound **10**

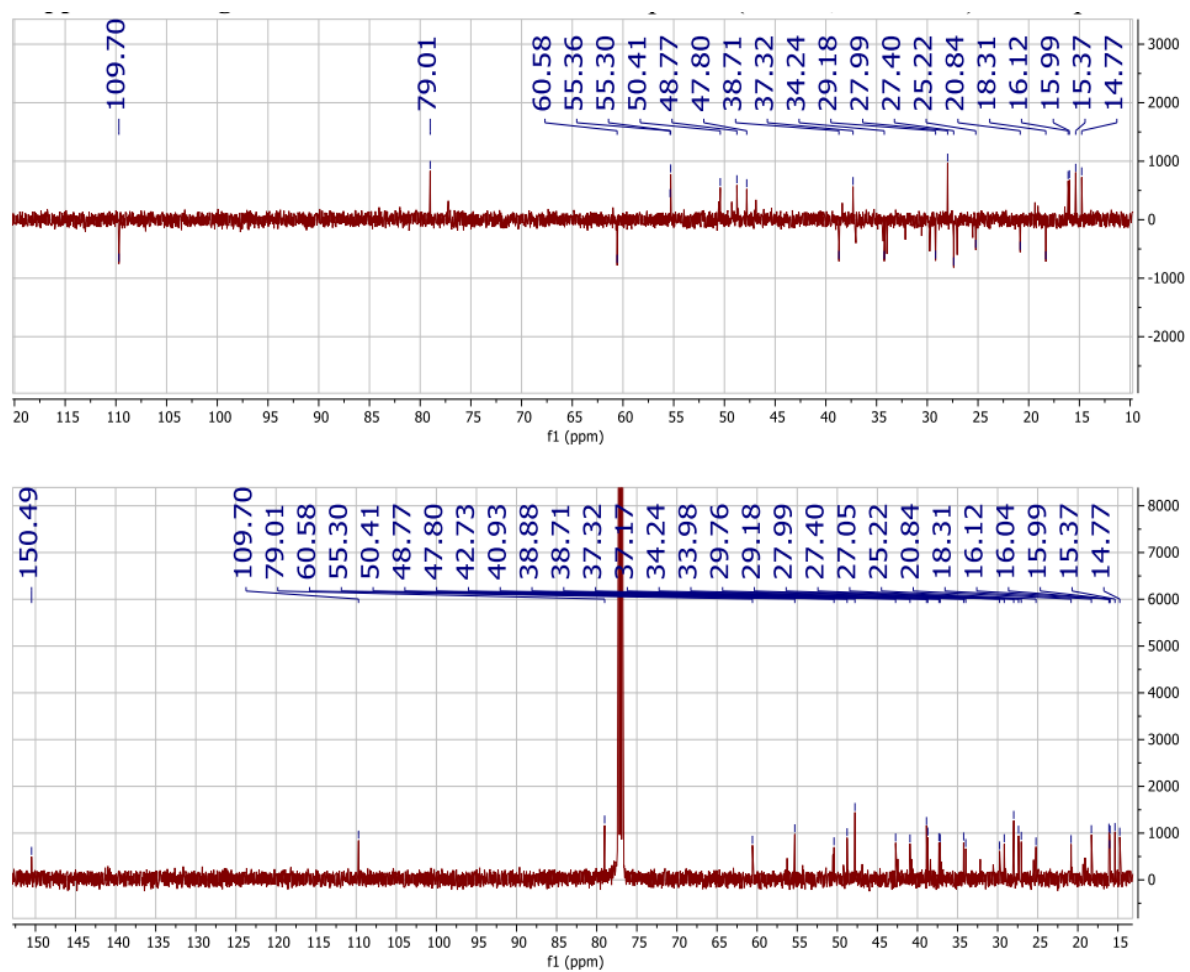

**Figure S27.** <sup>13</sup>C-NMR spectrum (CDCl<sub>3</sub>, 125 MHz) of compound **10**

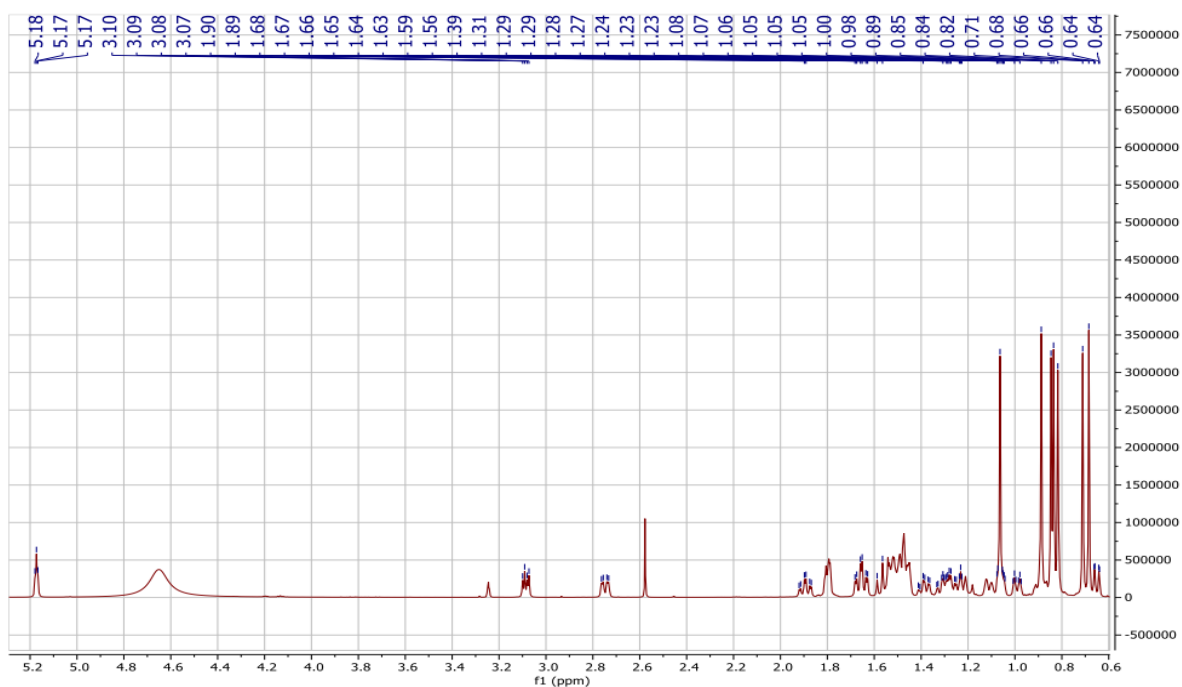

**Figure S28.** <sup>1</sup>H-NMR spectrum (MeOD; 600 MHz) of compound **11**

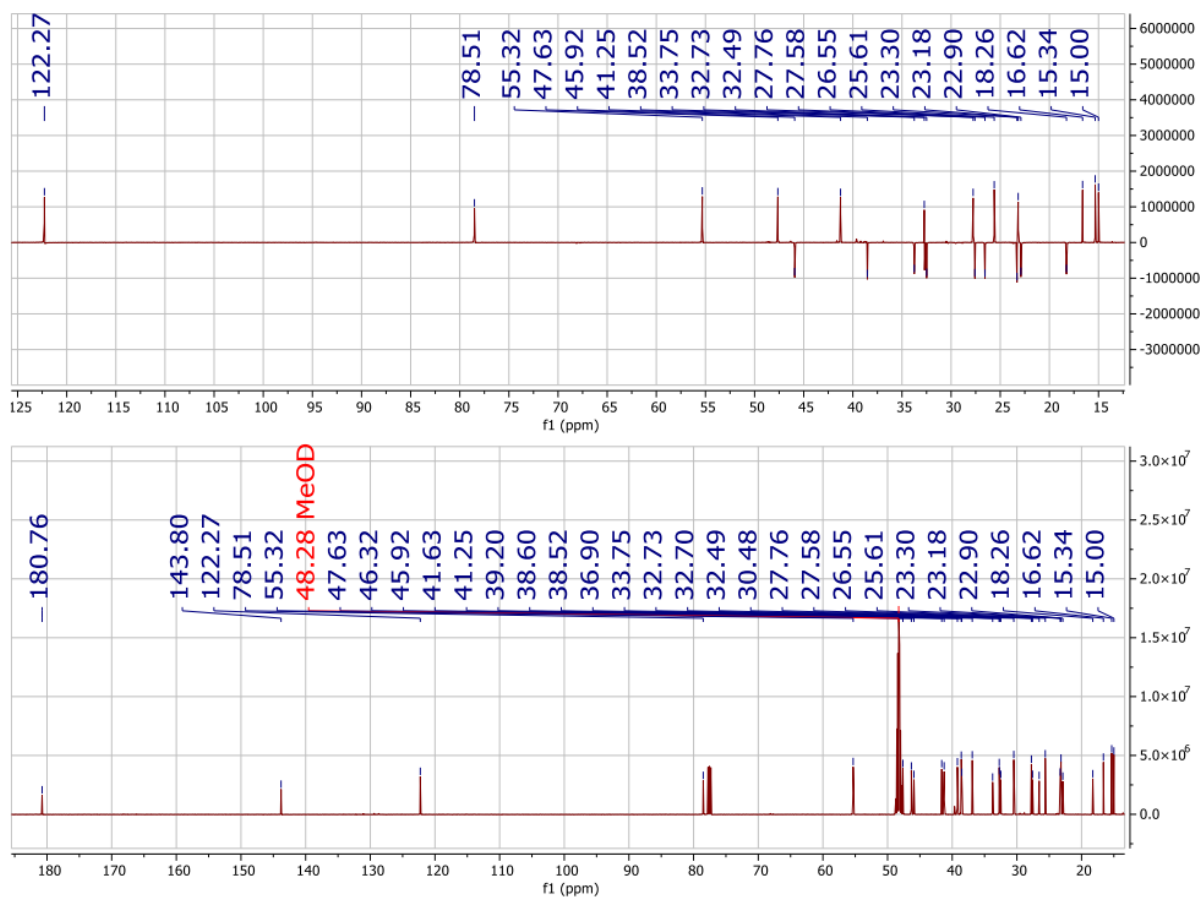

**Figure S29.** <sup>13</sup>C-NMR and DEPT 135 spectra (MeOD; 150 MHz) of compound **11**

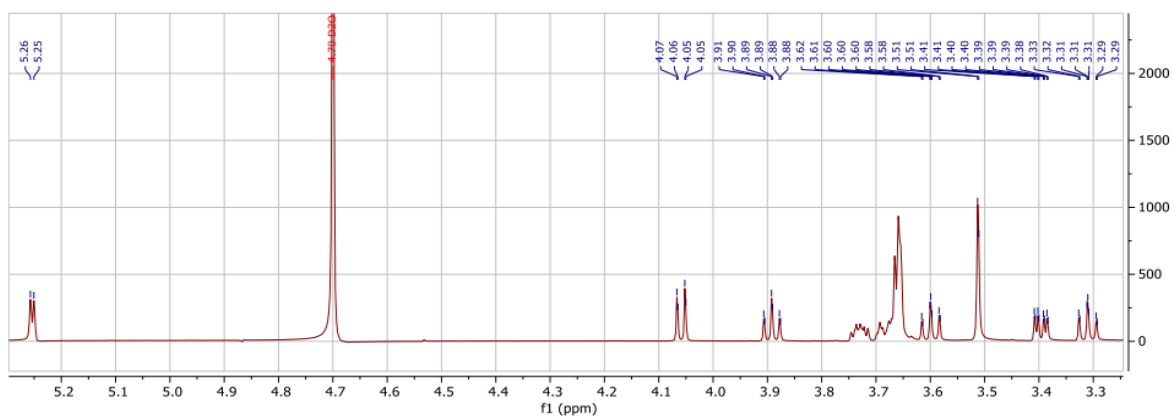

**Figure S30.**  $^1\text{H}$ -NMR spectrum ( $\text{D}_2\text{O}$ , 600 MHz) of compound **12**

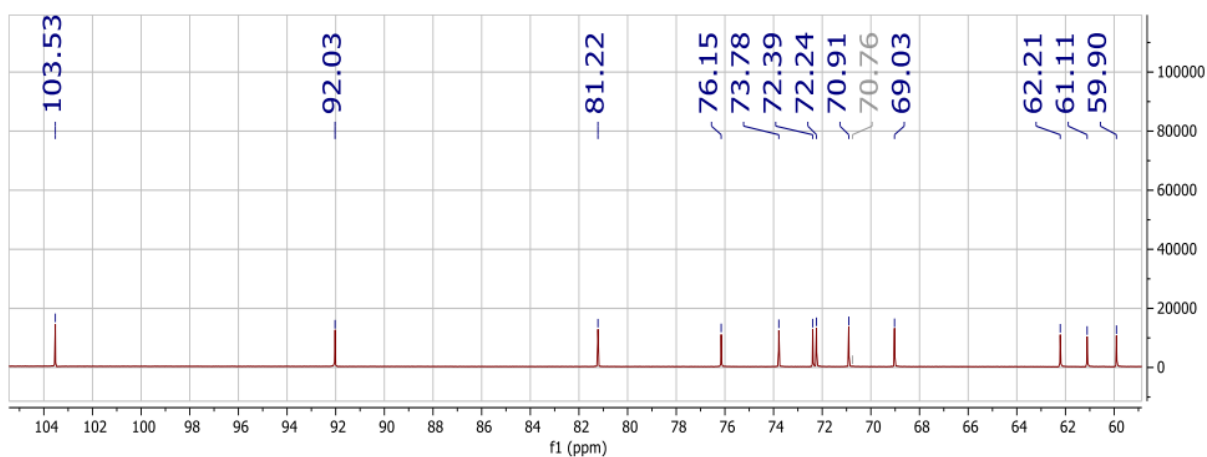

**Figure S31.**  $^{13}\text{C}$ -NMR spectrum ( $\text{D}_2\text{O}$ , 150 MHz) of compound **12**

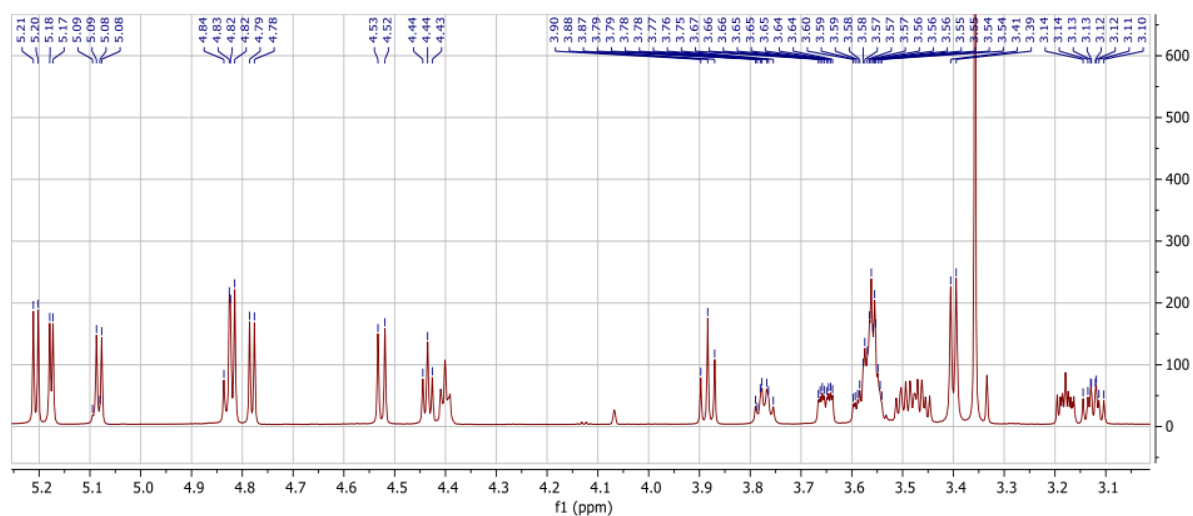

**Figure S32.**  $^1\text{H}$ -NMR spectrum ( $\text{DMSO}-d_6$ , 600 MHz) of compound **13**

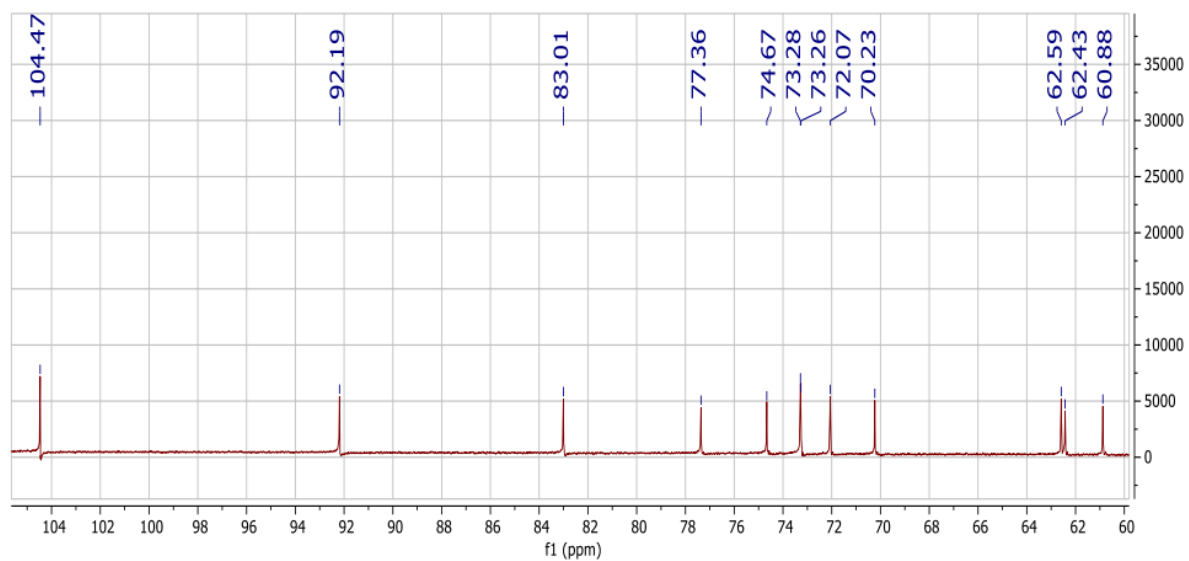

**Figure S33.** <sup>13</sup>C-NMR spectrum (DMSO-*d*<sub>6</sub>, 150 MHz) of compound **13**

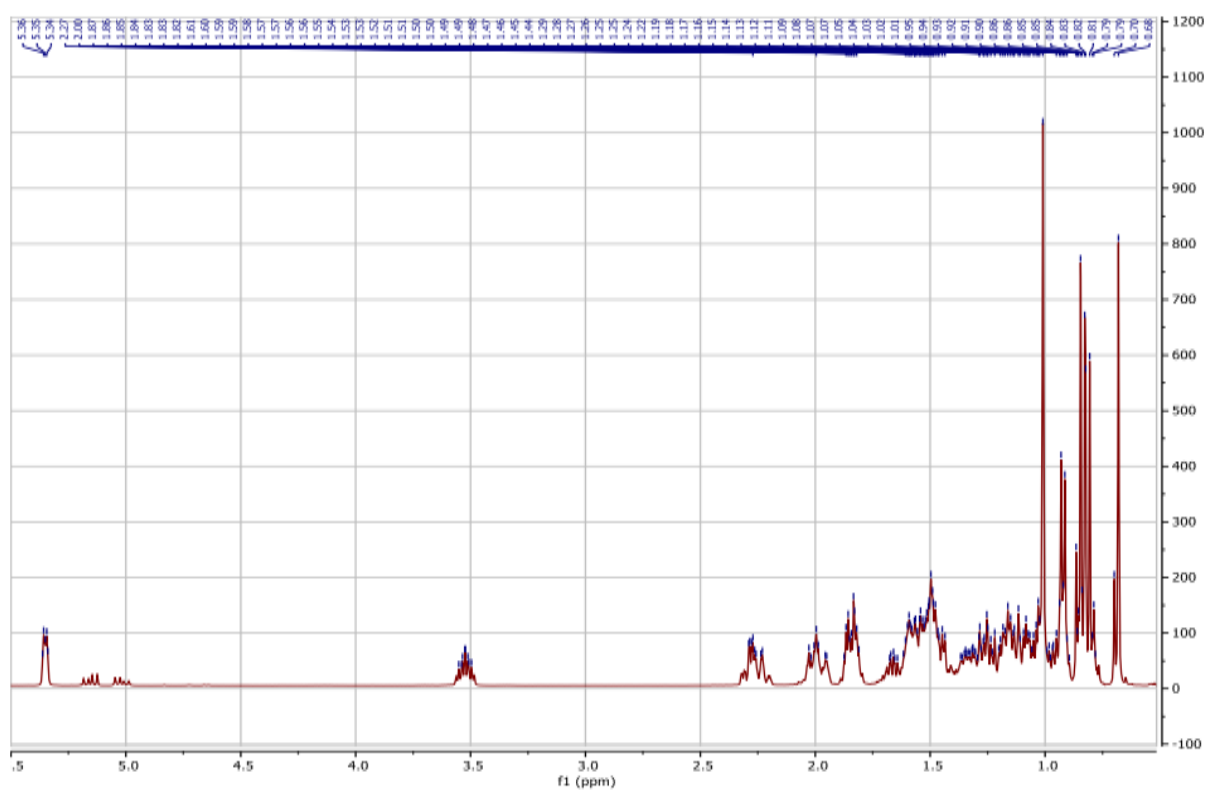

**Figure S34.** <sup>1</sup>H-NMR spectrum (CDCl<sub>3</sub>, 500 MHz) of compound **14** and **16**

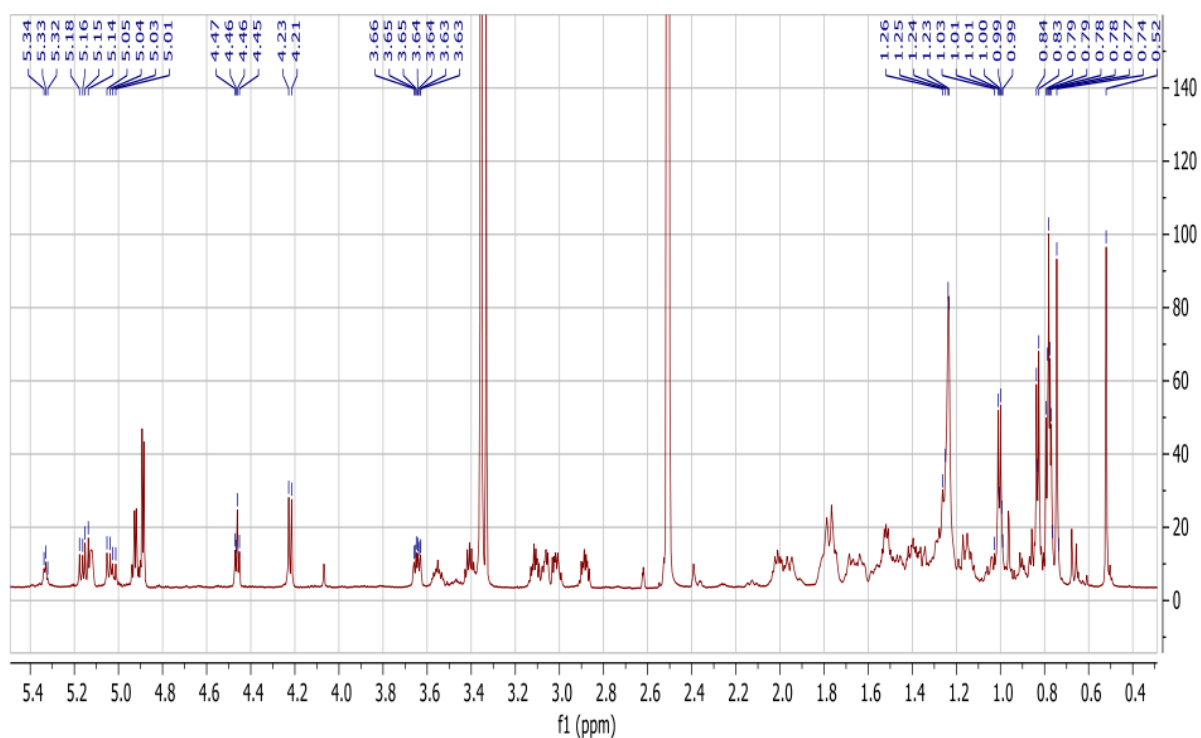

**Figure S35.**  $^1\text{H}$ -NMR spectrum (DMSO- $d_6$ , 500 MHz) of compounds **15** and **17**

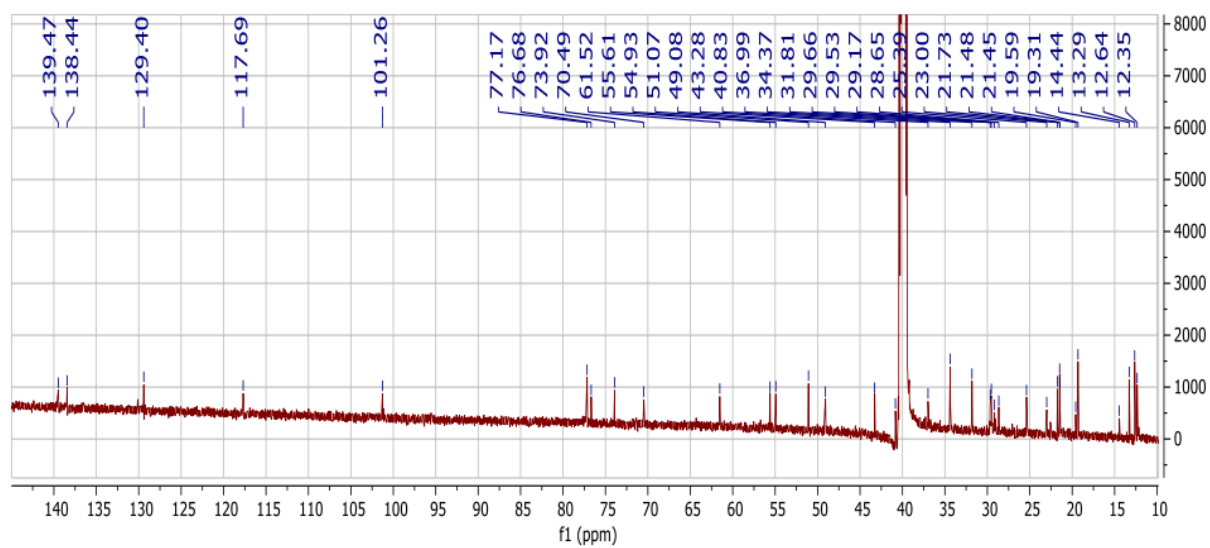

**Figure S36.**  $^{13}\text{C}$ -NMR spectrum (DMSO- $d_6$ , 125 MHz) of compound **17**

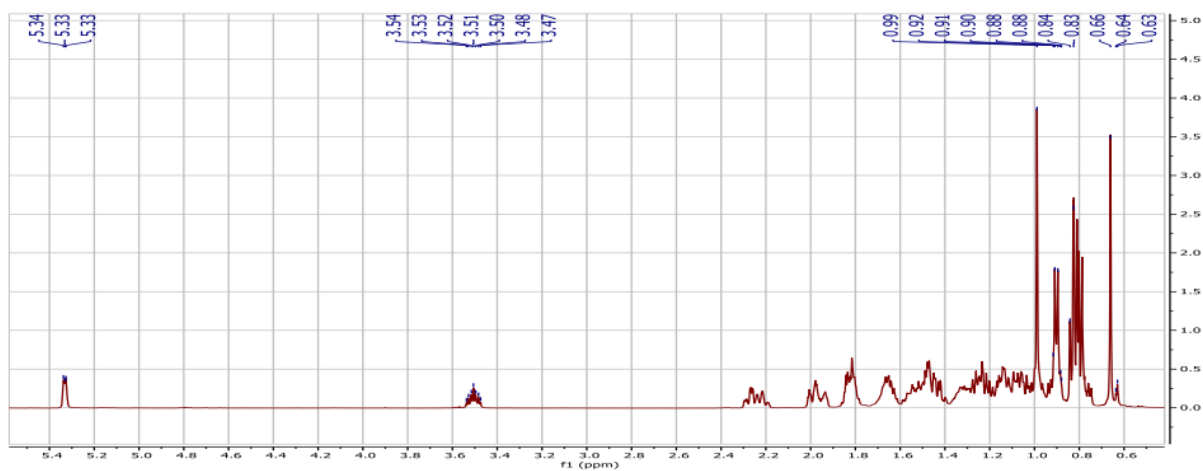

**Figure S37.**  $^1\text{H}$ -NMR spectrum ( $\text{CDCl}_3$ , 500 MHz) of compound **18**

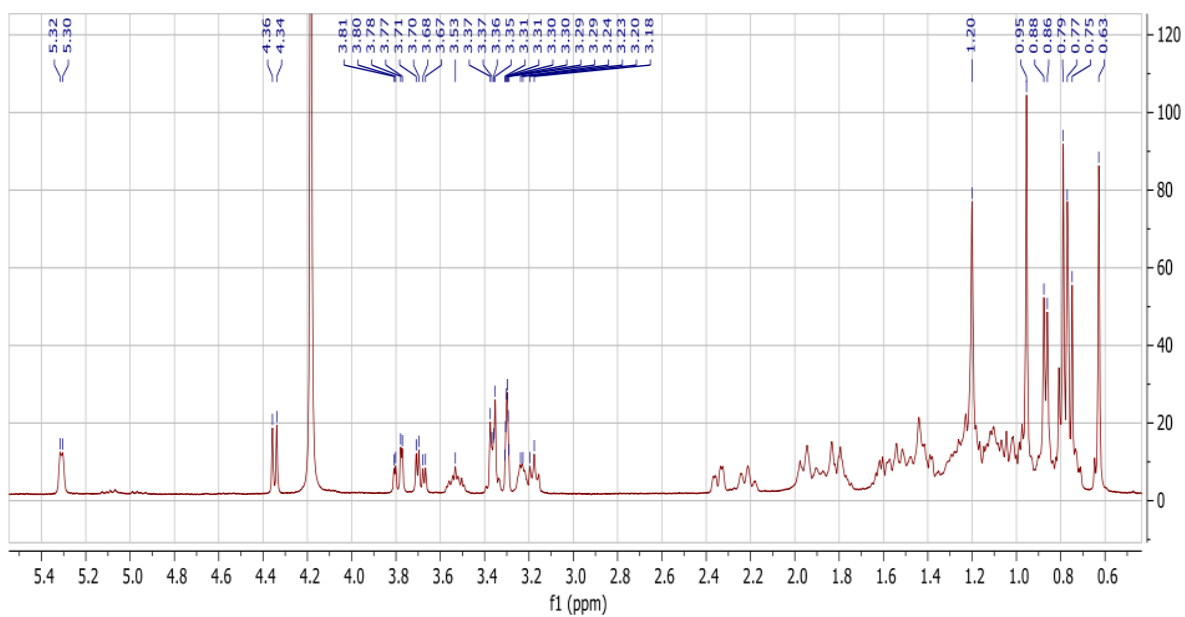

**Figure S38.**  $^1\text{H}$ -NMR spectrum ( $\text{MeOD}$ , 500 MHz) of compound **19**

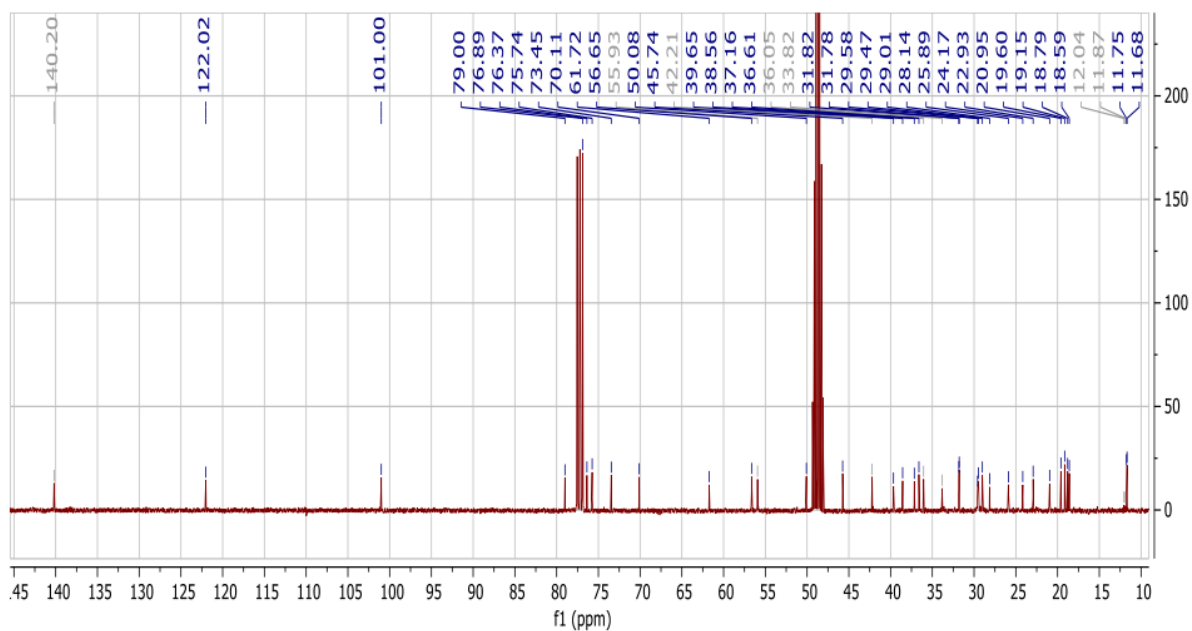

**Figure S39.**  $^{13}\text{C}$ -NMR spectrum ( $\text{CDCl}_3/\text{MeOD}$ , 125 MHz) of compound **19**

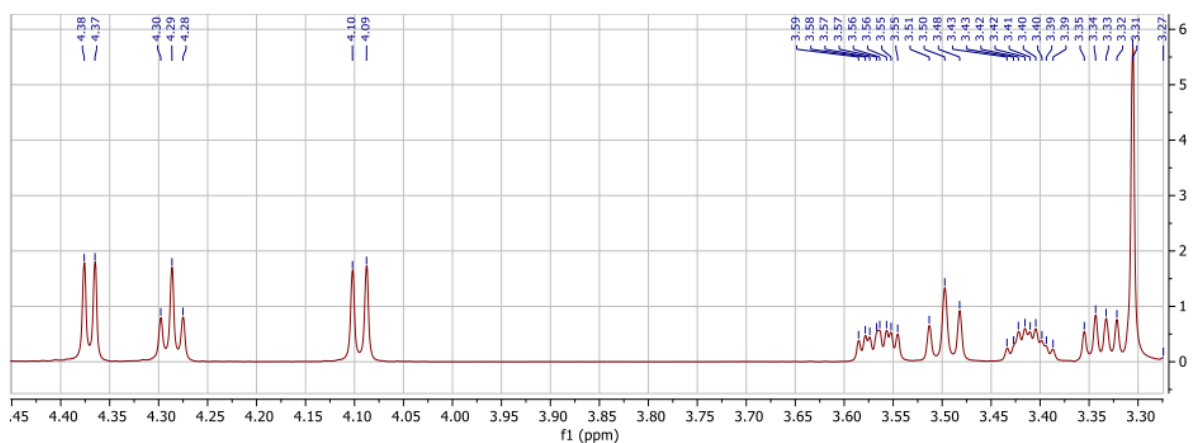

**Figure S40.**  $^1\text{H}$ -NMR spectrum ( $\text{DMSO}-d_6$ , 500 MHz) of compound **20**

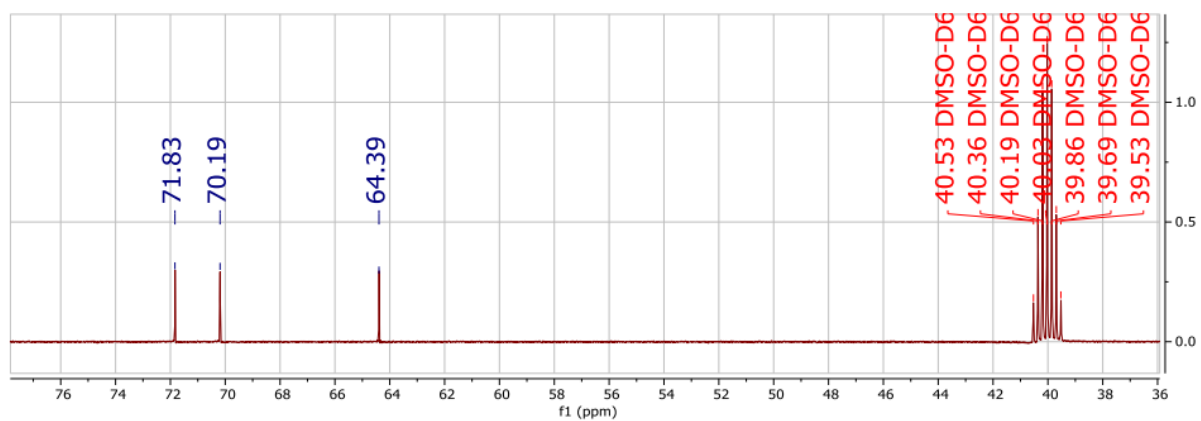

**Figure S41:**  $^{13}\text{C}$ -NMR spectrum (DMSO- $d_6$ , 500 MHz) of compound **20**

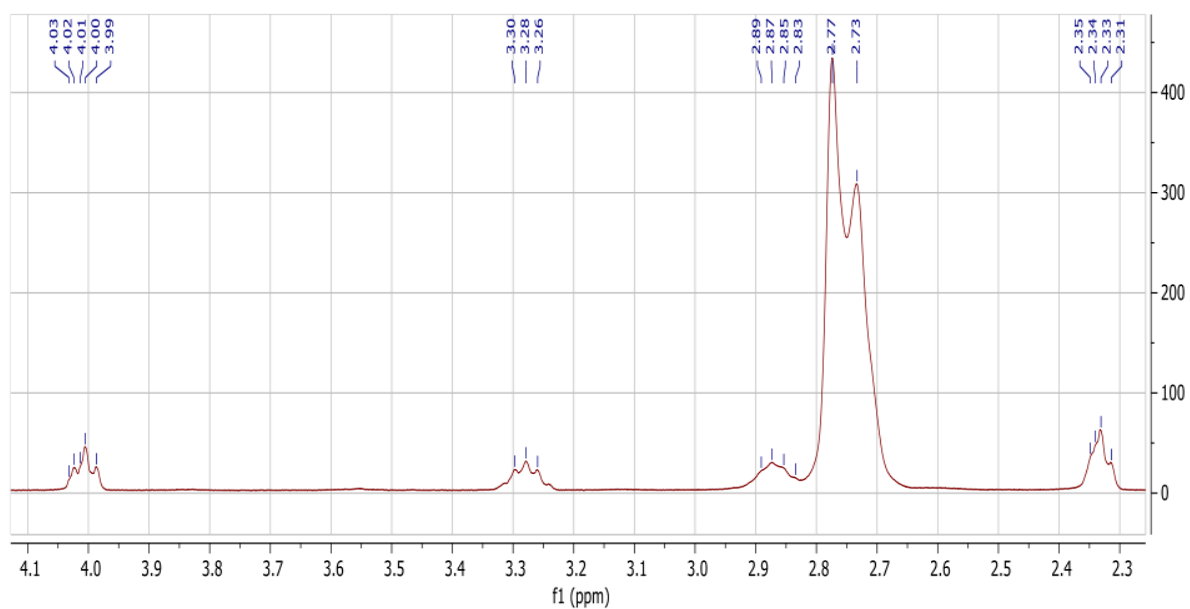

**Figure S42.**  $^1\text{H}$ -NMR spectrum (Pyridine- $d_5$ , 500 MHz) of compound **21**



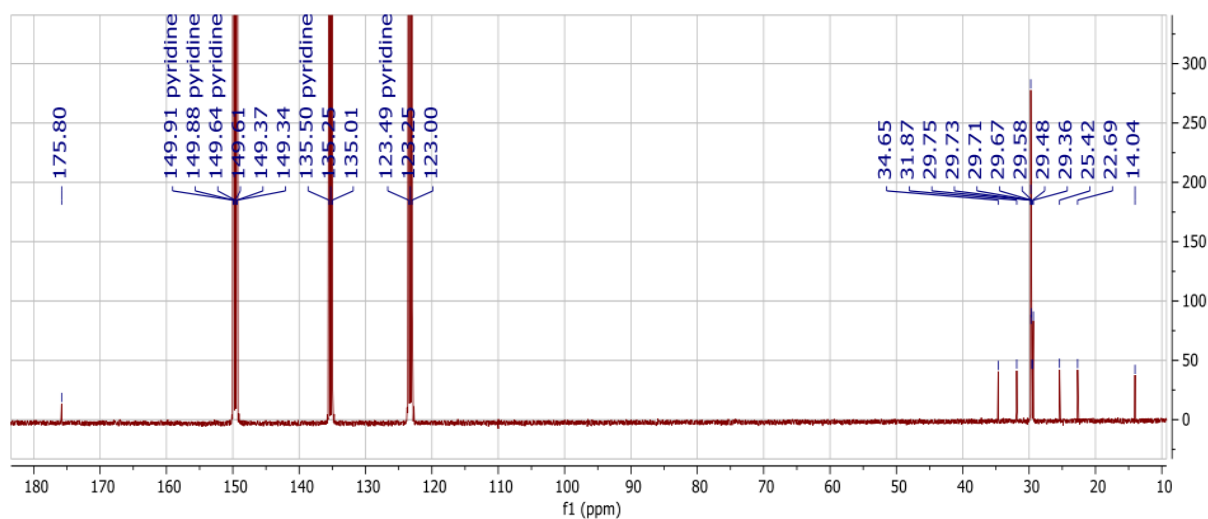

**Figure S43.** <sup>13</sup>C-NMR spectrum (Pyridine-*d*<sub>5</sub>, 125 MHz) of compound **21**

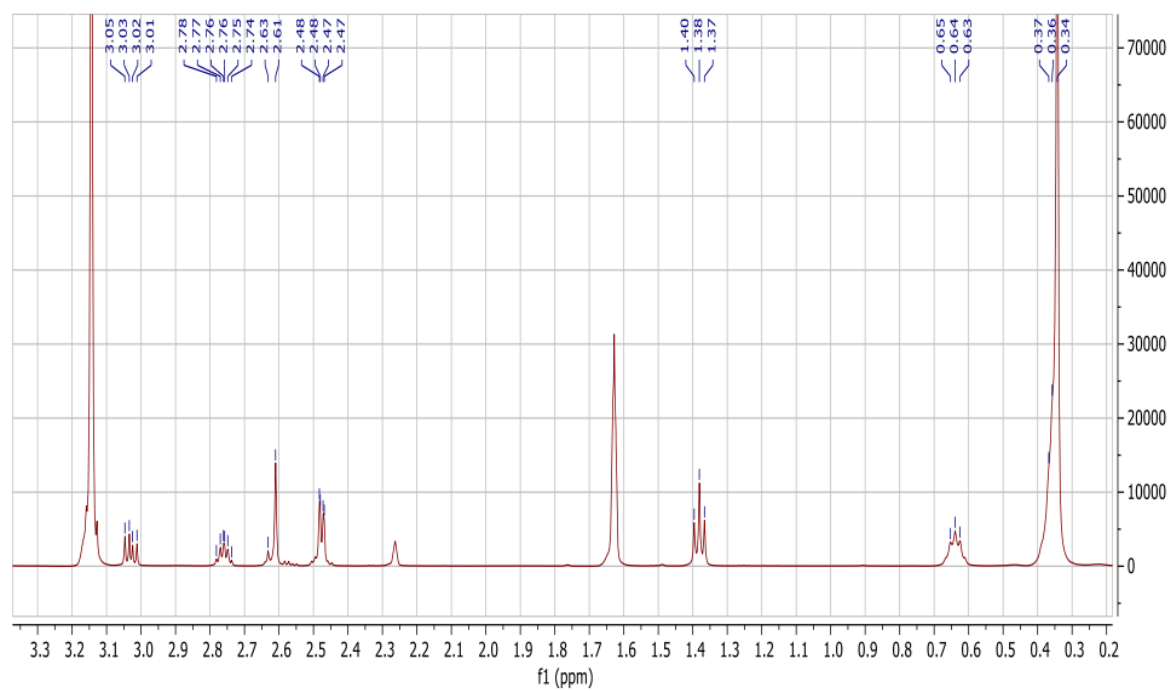

**Figure S44.** <sup>1</sup>H-NMR spectrum (DMSO-*d*<sub>6</sub>, 500 MHz) of compound **22**

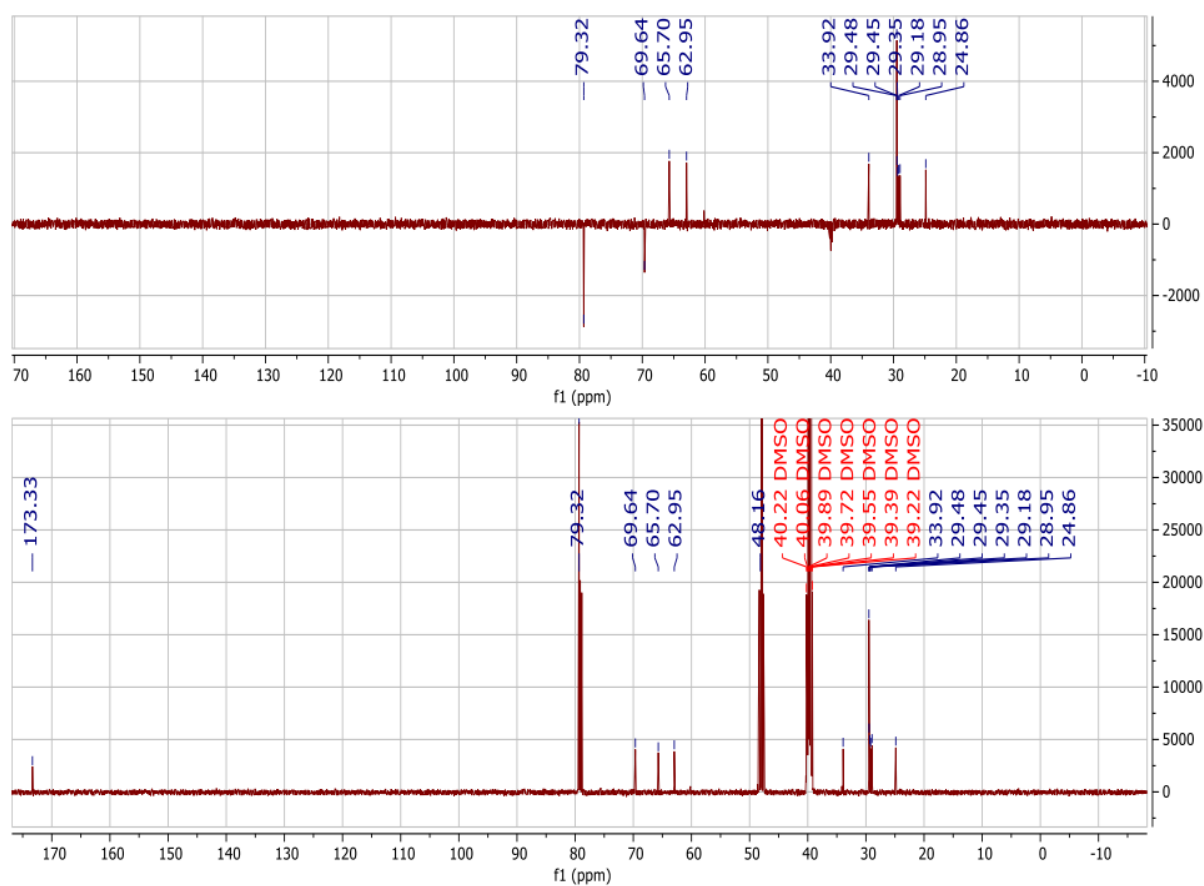

**Figure S45.** <sup>13</sup>C-NMR and DEPT 135 spectra (DMSO-*d*<sub>6</sub>, 125 MHz) of compound **22**
